33 **Email addresses:**

34 Pengju Zhao: zhaopengju2014@gmail.com

35 Xianrui Zheng: zxr07sk1@163.com

36 Ying Yu: yuying@cau.edu.cn

37 Zhuocheng Hou: zchou@cau.edu.cn

38 Chenguang Diao: firepanda007@163.com

39 Haifei Wang: wanghaifei@126.com

40 Huimin Kang: nongdaxiaokang@126.com

41 Chao Ning: ningchao@cau.edu.cn

42 Junhui Li: cooljunhui@126.com

43 Wen Feng: wfeng@cau.edu.cn

44 Wen Wang: wwang@wangweb-lab.org

45 George E. Liu: george.liu@ars.usda.gov

46 Bugao Li: jinrenn@163.com

47 Jacqueline Smith: Jacqueline.smith@roslin.ed.ac.uk

48 Yangzom Chamba: qbyz628@126.com

49 Jian-Feng Liu: liujf@cau.edu.cn

50

51

52

53

54

55

56

57

58

59

60

61 **Abstract**

62 A lack of the complete pig proteome has left a gap in our knowledge of the pig genome and has restricted the  
63 feasibility of using pigs as a biomedical model. We developed the tissue-based proteome maps using 34 major  
64 normal pig tissues. A total of 7,319 unknown protein isoforms were identified and systematically characterized,  
65 including 3,703 novel protein isoforms, 669 protein isoforms from 460 genes symbolized beginning with LOC,  
66 and 2,947 protein isoforms without clear NCBI annotation in current pig reference genome. These newly  
67 identified protein isoforms were functionally annotated through profiling the pig transcriptome with high-  
68 throughput RNA sequencing (RNA-seq) of the same pig tissues, further improving the genome annotation of  
69 corresponding protein coding genes. Combining the well-annotated genes that having parallel expression  
70 pattern and subcellular witness, we predicted the tissue related subcellular components and potential function  
71 for these unknown proteins. Finally, we mined 3,656 orthologous genes for 49.95% of unknown protein  
72 isoforms across multiple species, referring to 65 KEGG pathways and 25 disease signaling pathways. These  
73 findings provided valuable insights and a rich resource for enhancing studies of pig genomics and biology as  
74 well as biomedical model application to human medicine.

75 **Keywords:** Expression pattern; unknown protein; pig; proteome; subcellular components

76

## 77 **Background**

78 The domestic pig (*Sus scrofa*) is one of the most popular livestock species predominately raised for human  
79 consumption worldwide. Besides its socio-economic importance, pig has been generally recognized as a  
80 valuable model species for studying human biology and disease due to its striking resemblances with humans  
81 in anatomy, physiology and genome sequence(Ekser et al. 2015; Cooper et al. 2016). To date, many porcine  
82 relevant biomedical models have been created for exploring etiology, pathogenesis and treatment of a wide  
83 range of human diseases, *e.g.*, Parkinson disease(Bjarkam et al. 2008), obesity(Pedersen et al. 2013), brain  
84 disorder(Lind et al. 2007), cardiovascular, atherosclerotic disease(Agarwala et al. 2013) and Huntington's  
85 disease(Yan et al. 2018), *etc.* Furthermore, pigs and humans share similarities in the size of their organs,  
86 making pig organs potential candidates for porcine-to-human xenotransplantation(Cooper 2012; Li et al. 2016).  
87 Recently major efforts have been devoted to the development of tools for further enhancing the value of pigs  
88 as a biomedical model for human medicine as well as its role in meat production. Of essential significance is  
89 the completion of the assembly of the pig genome sequence (*Sus scrofa*11.1) in recent time. It provides  
90 researchers with a vast amount of genomic information, facilitating characterization of individual pig genome  
91 as well as genome comparison between pigs and humans.

92 With the progress of large-scale genome projects, such as ENCODE(Consortium 2012) and Human  
93 Proteome Projects(Legrain et al. 2011), many genes have been annotated at the RNA and protein levels, and  
94 diverse regulatory elements across the human genome were systematically characterized. This creates great  
95 opportunities for exploring how genetic variation underlies complex human phenotypes(Maher 2012). In  
96 particular, a spate of groundbreaking studies were succeeded in building high-resolution maps of the  
97 proteome(Kim et al. 2014; Wilhelm et al. 2014; Uhlen et al. 2015) in a variety of human tissues and cells.  
98 Findings from these studies greatly facilitate the functional annotation of the genome at multiple-omic levels  
99 and further improve the understanding of complexity of human phenotypes.

100 Compared with humans, however, studies of pig proteome are very limited(Chen et al. 2015; Fischer et  
101 al. 2015). In particular, in-depth identification and characterization of the proteome maps of the pig genome  
102 across a broad variety of pig tissues is not yet available. To date, the leading protein database UniProtKB  
103 comprised around 1,419 reviewed and 34,201 unreviewed pig proteins in Swiss-Prot and TrEMBL respectively.  
104 It is far less than the numbers of entries in Swiss-Prot (20,215 proteins) and TrEMBL (159,615 proteins)  
105 corresponding to human proteome data. Although the recent update of the pig PeptideAtlas presented 7,139  
106 protein canonical identifications from 25 tissues and three body fluid(Hesselager et al. 2016), this is still a  
107 limited promotion to whole pig proteome research. In fact, a large number of unreviewed and PeptideAtlas-  
108 identified pig proteins were not well annotated in current genome (*Sus scrofa*11.1) due to lack of specific

109 genomic locations and the corresponding assembled RNA transcripts. This suggests that there are still plenty  
110 of poorly annotated proteins that are not identified and characterized in previous pig studies. Besides, even if  
111 the annotated pig protein-coding genes (PCGs), nearly 20% of which were symbolized beginning with LOC  
112 — the orthologs and function of genes have not been determined — that also appeared one of the key  
113 limitations of pig gene set enrichment analysis. The absence of complete maps for the pig proteome triggers  
114 a substantial bottleneck in the progress of refining pig genome annotation and even hinders systematic  
115 comparison of omics data between humans and pigs.

116 Therefore, considering the potential contribution to developing pig proteomic atlases, we conducted in-  
117 depth characterization of pig proteome across 34 histologically normal tissues using high-resolution mass  
118 spectrometry. Accordingly, we exploited the novel protein firstly identified herein, poorly annotated proteins,  
119 and LOC proteins and defined these as the pig unknown proteins. These unknown proteins were mapped to  
120 the latest pig genome (*Sus scrofa*11.1) for confirming their available genomic locations. We then constructed  
121 pig transcriptomic atlas and subcellular characterization for these unknown protein isoforms to infer their  
122 connections with the specific function of tissues. Finally, systematically comparing the orthologous  
123 relationship of these unknown proteins with other multiple species, we further predicted the potential function  
124 of these unknown protein isoforms to ensure their availability in future relevant studies. Findings herein will  
125 benefit studies and development of pig genome and will allow further investigation of swine gene function  
126 and networks of particular interest to the scientific community.

127

## 128 **Results**

### 129 **Tissue-based map of the pig proteome**

130 We explored proteome from 34 pig tissue (Figure 1a) samples using liquid chromatography tandem mass  
131 spectrometry (LC-MS/MS). We performed *in silico* analyses (Figure 1b) to construct the whole landscape of  
132 the pig proteome with a view to furthering pig biological research and human medical studies. The resulting  
133 proteome data involved a total number of 21,681,643 MS/MS spectra produced from 680 LC-MS/MS runs  
134 (20 runs per tissue).

135 To exploit convincing peptide evidence for all putative PCGs in the pig genome, we searched the raw  
136 MS/MS data by Mascot(Perkins et al. 1999) against multiple protein databases. These included the primary  
137 pig database of UniProt(UniProt 2015) for the initial search and two custom-developed databases for  
138 sequential searches of unmatched spectra, *i.e.*, (1) RNA-seq-based *de novo* assembly transcriptomic database  
139 which included the RNA-seq data generated from the 34 tissues in this study, 1.08 Gb data from an external  
140 public expressed sequence tag (EST) database and 953.57Gb from publicly available RNA-seq data (Materials  
141 and Methods), (2) a six-frame-translated pig genome database. Those corresponding matched spectra extracted  
142 from each subset of databases were re-searched against the same database by X!Tandem(Craig and Beavis  
143 2003) for further filtration to produce the final 5,082,599 peptide spectrum matches (PSMs). Subsequently,  
144 Scaffold (version Scaffold\_4.4.5, Proteome Software Inc., Portland, OR) was run for MS/MS-based peptide  
145 and protein identification, both using the global false discovery rate (FDR) criterion of 0.01.

146 Totally, we identified 212,154 non-redundant peptides with a median number of 8 unique peptides per  
147 gene (Quality assessment of protein identification is shown in Figure S1-14). Comparison of identified  
148 peptides with the largest pig peptide resource PeptideAtlas (<http://www.peptideatlas.org/>) showed that 49,144  
149 out of 87,909 curated peptides (56%) were confirmed by our identification. The peptides we detected greatly  
150 outnumbered those deposited in PeptideAtlas, with a major fraction (77%) found to be novel. A total of 24,431  
151 protein isoforms with median sequence coverage of 30.32% were determined by Scaffold, which corresponded  
152 to 19,914 PCGs. To ascertain whether our protein identifications included a reasonable false positive error  
153 rate, we additionally validated 31 proteins from different proteogenomic categories. By comparing MS/MS  
154 spectra from 71 synthetic peptides with those obtained from our analysis of pig tissues, we obtained 100%  
155 validation (Table S1; Supplemental file 1).

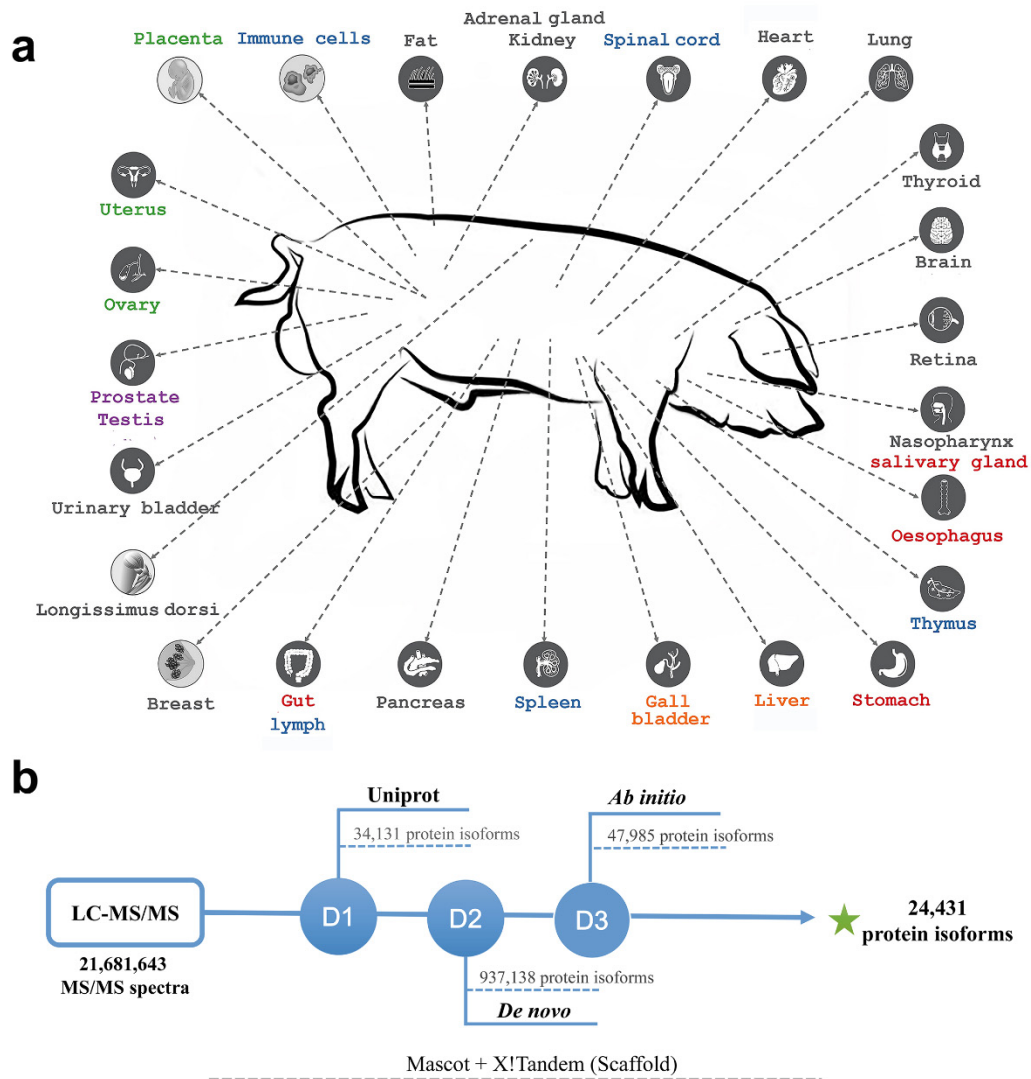

156

157 **Figure 1. Overview of pig transcriptome-based annotation**

158 **a.** 34 pig tissues analyzed in this study. 34 representative normal pig tissues were selected as the resource of  
 159 proteome and transcriptome for exploring convincing evidence of putative PCGs, where A and I respectively  
 160 represent adult and infancy pig tissue.

161 **b.** The custom pipeline for proteome-based annotation. Four protein database were used for protein searching  
 162 based on Mascot and X!Tandem software with the same criteria.

163 **Identification and characterization of unknown pig proteins**

164 Classifying all of 24,431 identified protein isoforms (Figure 2a), we found 16,738 (68.51%) protein isoforms  
 165 were confirmed by the Uniprot protein evidence, 9,204 (37.67%) protein isoforms had evidence from pig  
 166 PeptideAtlas(Hesselager et al. 2016), 17,781 (72.78%) protein isoforms were included in NCBI protein  
 167 database, and 7,910 (32.38%) were supported by all of them. Of all confirmed protein isoforms, 17,781

168 (85.78%) protein isoforms according to 11,308 PCGs were included in known NCBI annotation, 669 protein  
169 isoforms according to 460 PCGs were annotated in the pig genome but classified as uncharacterized LOC  
170 genes, and 2,947 protein isoforms remain a lack of NCBI annotation support in the pig genome (Figure 2b).  
171 The rest of 3,703 protein isoforms were identified by MS/MS data for the first time in this study, which can  
172 be considered as potential novel proteins.

173 To further enhance the annotation of PCGs for the current pig genome, we systematically characterize  
174 these 7,319 feature or/and location unknown protein isoforms detected in current study (*i.e.*, 669 protein  
175 isoforms of LOC genes, 2,947 protein isoforms without genomic location annotation and 3,703 protein novel  
176 isoforms firstly identified herein). Considering only 9.14 % of protein isoforms (LOC genes) had the available  
177 genomic locations, we mapped the rest of 6,650 unknown protein isoforms to the pig reference genome (*Sus*  
178 *scrofa*11.1) by MAKER annotation workflow (Cantarel et al. 2008). First, the low-complexity repeats of pig  
179 reference genome were soft-masked by RepeatMasker. Totally 6,650 out of 7,319 unknown protein isoforms  
180 (non-LOC genes) were aligned to the masked reference genome by BLAST(Mount 2007). Sequentially,  
181 Exonerate(Slater and Birney 2005) was run to realign and polish the exon–intron boundaries of the unknown  
182 gene with the splice-site aware alignment algorithm. A total of 5,027 (75.6%) unknown protein isoforms (non-  
183 LOC genes) were successfully aligned to the reference genome with the sequence identity > 95% and  
184 similarity > 95% (2,381 with the 100% identity and 100% similarity), including 4,819 assigned to  
185 chromosomes and 208 resided on 33 unplaced scaffolds. More interestingly, we found that the proportion of  
186 novel proteins mapped in respective chromosomes was related to the levels of genomic improvement from  
187 *Sus scrofa*10.2 to *Sus scrofa*11.1 for different chromosomes (Figure 2c,  $R^2 = 0.67$ ,  $P = 0.0015$ ). This  
188 demonstrated that these unknown proteins, especially the novel proteins, were actually ignored in current pig  
189 genome annotation since most of previous studies have been limited to *Sus scrofa*10.2 genome and fewer  
190 tissues.

191 Comparison of these unknown proteins isoforms with the well-annotated proteins revealed that, a major  
192 fraction of unknown protein isoforms (40.29%), especially the novel protein isoforms (53.07%), were merely  
193 identified in a single tissue that far more than well-annotated protein isoforms. It can be speculated that most  
194 of novel protein isoforms were more likely tissue specificity, resulting in the neglect of proteins in previous  
195 studies. Additionally, further analysis of the reliability for these unknown proteins, we found a major fraction  
196 of them (52.55%) were regarded as the abundant proteins that have more than ten spectral counts(Zhou et al.  
197 2012). Particularly, although these novel protein isoforms were first identified in this study, almost 65.75% of  
198 all were supported by a high spectral count of > 5, indicating that the identification of these novel protein  
199 isoforms significantly enhances the current pig protein database with convincing evidence.



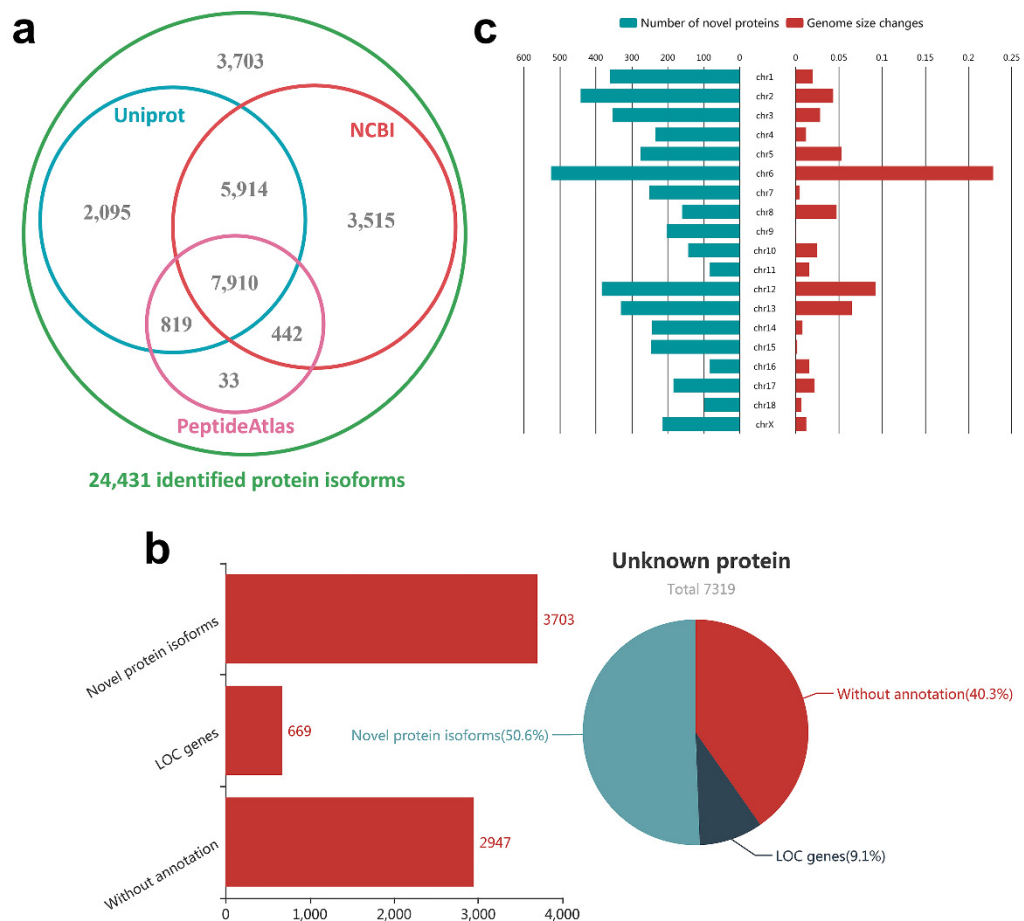

200

201 **Figure 2. Characterization of unknown pig protein isoforms**

202 **a.** Confirmation of 24,431 identified protein isoforms by other pig protein databases.

203 **b.** Classification of unknown pig protein isoforms. Bar chart and pie chart respectively show the numbers and  
 204 percents of three categories in 7,319 unknown pig protein isoforms.

205 **c.** Relationship between the improvement of genome quality and novel proteins.

206 **Expression landscape of unknown protein isoforms by profiling pig transcriptome**

207 To further probe potential function of unknown protein isoforms, we characterized the expression landscape  
 208 of unknown protein isoforms by high-throughput RNA sequencing (RNA-seq) of the 34 identical tissue  
 209 samples as in the LC-MS/MS analyses. Compared to the label-free LC-MS/MS method that mainly applied to  
 210 protein identification, RNA-seq was able to better reflect the gene expression level in the organism.

211 Approximately 1,495 million paired-end reads (376.7G bases per tissue) were obtained through  
 212 sequencing 116 strand-specific paired-end RNA libraries, of which 1,230 million were mapped to the pig

213 genome (*Sus scrofa* 11.1) with an overall pair alignment rate of 88.29% (Table S2). As expected, a total number  
214 of 2,486,239 transcripts (the FPKM > 0.1 in at least one tissue) corresponding to 29,270 genes were then  
215 assembled and quantified across all tissues, which contained 5,250 annotated transcripts corresponding to  
216 3,486 known noncoding genes, 7,595 potentially novel alternatively spliced transcripts corresponding to 2,421  
217 known noncoding genes, 55,328 annotated transcripts corresponding to 20,401 PCGs, 136,537 potentially  
218 novel alternatively spliced transcripts corresponding to 15,385 PCGs, and 2,281,529 newly assembled  
219 transcripts corresponding to 26,493 genes in the pig genome without annotation information. These findings  
220 clearly increased the average number of isoforms per gene (Human-NCBI: 7.27, Pig-NCBI: 2.75, Pig-  
221 Identified: 6.60) compared with existing gene annotation in NCBI (Figure 3a).

222 On the basis of all the currently well-annotated genes, we constructed a tissue similarity map using  
223 hierarchical clustering based on the Pearson correlation across the 34 tissues. As shown in Figure 3b, (with  
224 the exception of three obvious outliers - adult testis, pancreas and peripheral blood mononuclear cells (PBMC)),  
225 data clustered into multiple known connected groups: liver and kidney, muscular system (longissimus dorsi  
226 and heart), nervous system (retina, brain and spinal cord), adult immune organs (spleen, salivary gland and  
227 lymph), bladder tissue (urinary bladder, gall bladder and oesophagus). These results showed the expected  
228 biology that had a similar expression profile to that of human tissues (Uhlen et al. 2015), reflecting the  
229 biological similarity between human and pig, as well as the reliability of transcripts we constructed.

230 Intriguingly, we observed a total of 47.72% (3,493) of unknown protein isoforms were successfully  
231 confirmed by the transcripts constructed herein, which offered a detailed view of the understanding of  
232 unknown proteins. Considering the comparison of unknown protein isoforms with the potential low-  
233 expression levels in different tissue, we applied zFPKM normalization method (Hart et al. 2013) to generate  
234 high-confidence estimates of gene expression. The observed zFPKM range of unknown protein isoforms  
235 expression ranged from -3 to 19.89, having on lower average expression levels (zFPKM=2.53), especially the  
236 novel protein isoforms (zFPKM=2.20), than well-annotated PCGs (zFPKM=3.62). Besides, we also found that  
237 these unknown protein isoforms (average 11.7 tissues) were tend to be expressed in less tissues than well-  
238 annotated PCGs (average 21.3 tissues), and nearly 41.6% ( $n=1453$ ) of unknown protein isoforms were only  
239 identified in single tissues. The results showed that the previously incomplete annotation of these unknown  
240 protein isoforms were more likely due to their specific expression characteristics (Figure 3c).

241 Screening the protein isoforms expression patterns in each tissue, we found that the majority expression  
242 of transcripts were dominated by the expression of a small proportion of genes in all of the investigated tissues  
243 (Table S3). Specifically, the adult pig tissues of prostate, longissimus dorsi, pancreas, gall bladder, *etc.*, had  
244 the least complex transcriptome, with 50% expression of the transcripts coming from a few highly expressed

245 genes (3 to 8 transcripts). In contrast, the reproductive tissues (uterus, testis and ovary), expressed more  
 246 complex transcriptome, with a large number of genes expressed. Similar patterns have also been reported in  
 247 human tissue transcriptome studies (Mele et al. 2015). It was surprising that 203 unknown protein isoforms  
 248 were potentially associated with 148 (13.98%) highly expressed genes, suggesting these unknown protein  
 249 isoforms play an important role in basic function among tissues or organs.

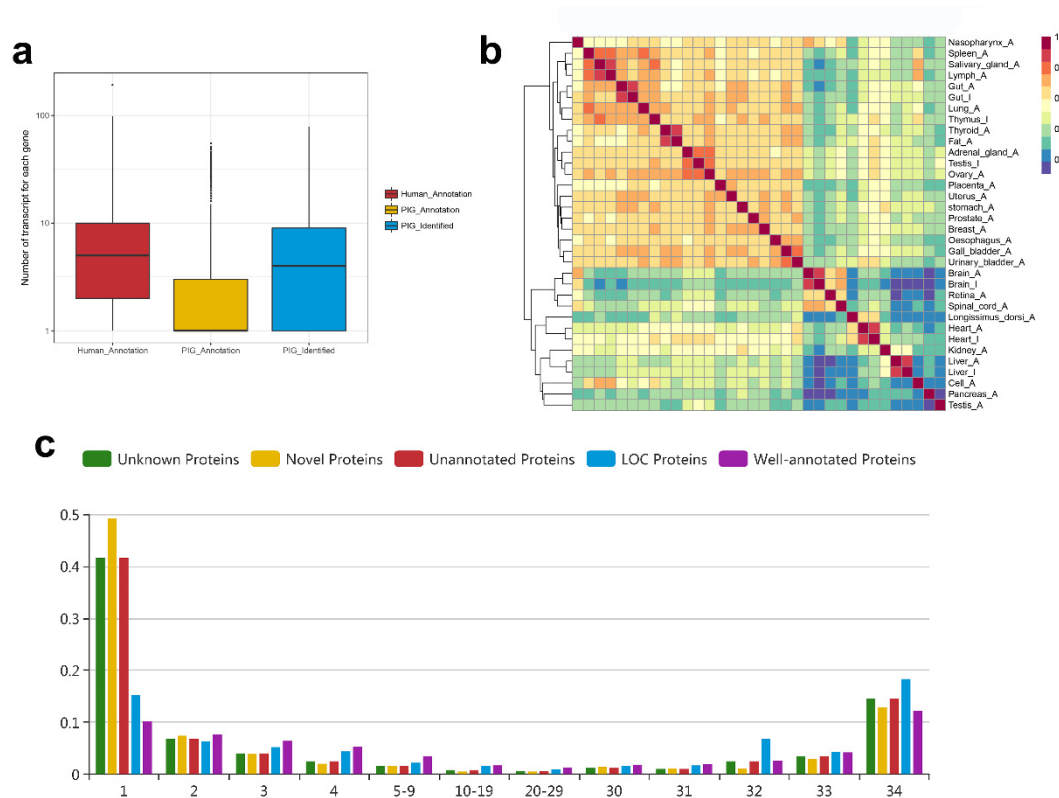

250

### 251 **Figure 3. The pig transcriptome in unknown protein isoforms**

252 **a.** Comparison of number of isoforms expressed per gene between humans and pigs. The box plots compare  
 253 the number of isoforms expressed per gene within three transcript sets, including known human Ensembl set,  
 254 known pig Ensembl set and the newly identified set of this study.

255 **b.** The heatmap for Pearson correlation between 34 tissues. The heatmap was used to reveal the pairwise  
 256 correlation between all 34 pig tissues.

257 **c.** Bar chart for tissue-based transcriptomic evidence of unknown protein isoforms. The x-axis represents the  
 258 numbers of tissue and the y-axis represents the numbers of protein.

### 259 **Prediction of unknown proteins function from pig transcriptome**

260 Several approaches for systematic analysis of gene expression across different tissues have found that gene  
 261 expression patterns were usually associated with their biological functions, as well as genes with the similar

262 functions are more likely to exhibit similar expression patterns (Zheng-Bradley et al. 2010). Implementing the  
263 similar classification criteria for human genes(Uhlen et al. 2015) into the RNA-seq data generated from the  
264 multiple pig tissues herein, we classified all 23,887 putative NCBI genes (18,377 PCGs) corresponding to  
265 well-annotated 60,578 transcripts and 3,493 unknown protein isoforms into three categories for exhibiting  
266 their expression features. The number of tissue-enriched genes, group-enriched genes and ubiquitously  
267 expressed genes are also displayed as a network plot to show an overview of pig PCGs (Figure 4a).

268 In multicellular organisms, genes expressed in a few tissue types are thought to be tissue-enriched genes  
269 which have tissue-specific related functions. We observed 8,482 (14%) well-annotated transcripts (5,592 genes)  
270 and 1,453 (41.6%) unknown protein isoforms that have a specific expression in a particular tissue, as well as  
271 16,356 (27%) well-annotated transcripts (9,726 genes) and 241 (6.9%) unknown protein isoforms being  
272 expressed at least 5-fold higher at the zFPKM level in one tissue compared to the tissue with a second highest  
273 expression. Similarly to previous studies in humans(Uhlen et al. 2015) (Figure 4b), the largest number of  
274 tissues enriched genes were detected in the adult testis, followed by infancy brain, retina and adult brain. The  
275 results reflected that the tissues with complex biological processes usually have more tissue-enriched genes,  
276 and these tissue-enriched genes were strongly associated with the function of the corresponding tissues. This  
277 can be is exemplified by the *RHO* (Rhodopsin) gene that was enriched in retina and was proven to play  
278 important roles in retinal pigments(Yu et al. 2016). This demonstrates that the tissue specificity can not only  
279 confirm the biological characteristics of known genes but also predict basic function of undefined genes in  
280 pigs. Accordingly, we successfully updated 1,694 tissue-enriched unknown protein isoforms to further explain  
281 the functional differences among tissues.

282 Apart from the gene observed in tissue specificity, some group-enriched genes over-represented in the  
283 group of tissues/organs that work together to perform closely related functions. Accordingly, we found a total  
284 of 1,318 (2.18%) well-annotated transcripts (948 genes) and 52 (1.49%) unknown protein isoforms were  
285 detected and could be grouped into seven types of tissue (Figure 4c). The largest fraction (72.7%) of group-  
286 enriched genes belonged to the brain tissues (14.7%), followed by the muscular system (cardiac muscle,  
287 longissimus dorsi), adrenal and thymus gland (6.6 %), liver and gallbladder (4.5 %). Generally, these group-  
288 enriched genes have potential role in biological system function, and this expression patterns were usually  
289 shown between different species. As exemplified by the group-enriched expression of *MYL3* (myosin light  
290 chain 3, a known myosin component) (Figure 4d) and *ENC1* (Ectodermal-Neural Cortex 1, involved in  
291 mediating uptake of synaptic material) (Figure 4e). Both of these genes indicated a similar expression in the  
292 muscular system and in brain tissue between humans and pigs. Therefore, 52 of unknown protein isoforms  
293 will be the valuable resources that expected to further enrich the functional and comparative genomics between

294 pig and human.

295 Specifically, we found 5,656 well-annotated transcripts corresponding to 5,147 (21.55%) NCBI genes  
 296 expressed in all pig tissues. Among these genes, a variety of known “housekeeping” genes such as *ACTB*,  
 297 *GAPDH*, *PGK1*, *RPL19*, etc. (Figure 4f) are usually intracellular and tend to be functionally essential to cell  
 298 subsistence that involved in metabolism, transcription, and RNA processing or translation (Ramskold et al.  
 299 2009). Interestingly, 507 (14.5%) of unknown protein isoforms were detected as the ubiquitously expressed  
 300 genes, suggesting that the findings of these unknown protein isoforms offered the important supplement to pig  
 301 genomic annotation. To characterize the set of ubiquitously expression of these unknown genes identified  
 302 herein, we constructed a co-expression network heatmap that consisted of 24 blocks for assessing ubiquitously  
 303 expressed gene co-expression interactions across all pig tissues (Figure 4g). Obviously, these unknown protein  
 304 isoforms have potentially functional connections with the well-annotated gene that in the same blocks (Table  
 305 S4), which can be explained by those genes within modules of a co-expression network may be involved in  
 306 similar or related pathways or biological processes (Liang et al. 2014).

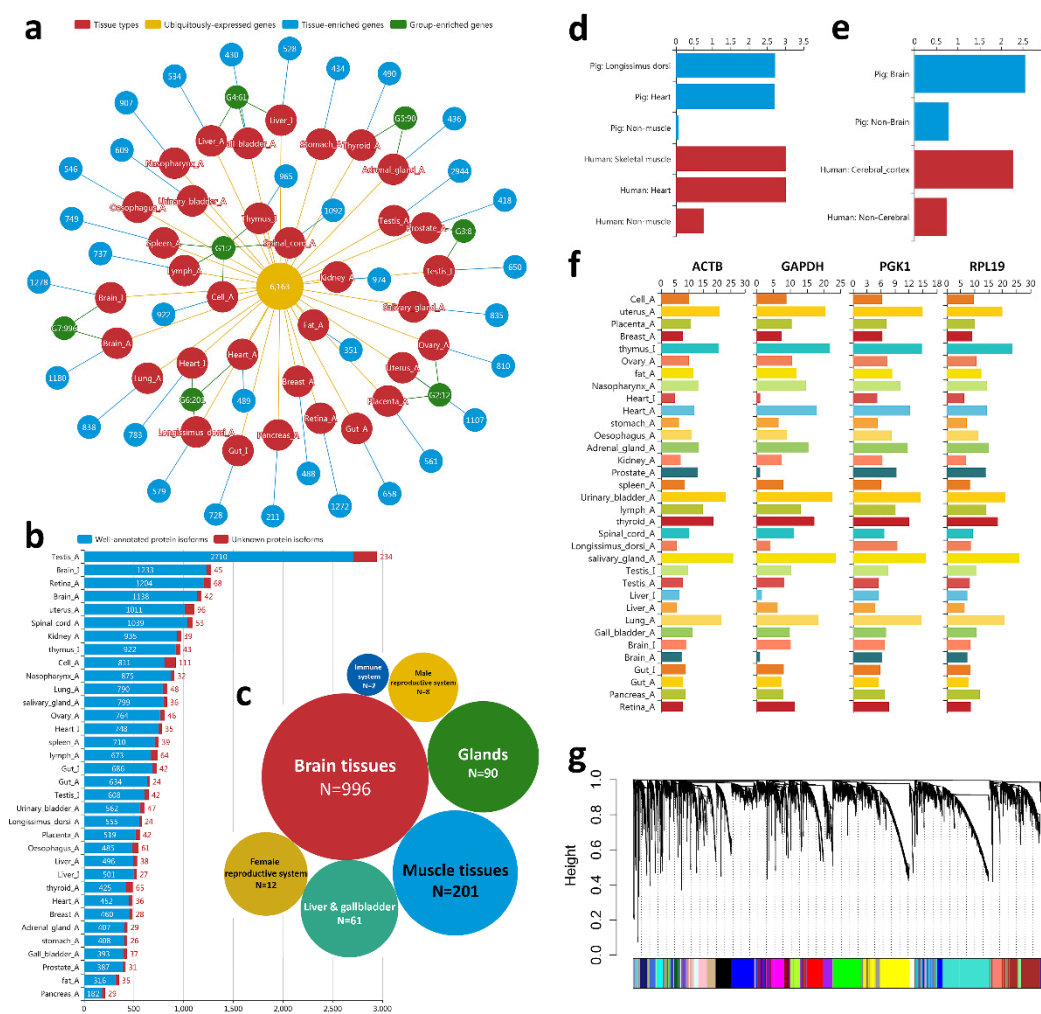

307

308 **Figure 4. Expression landscape in pig transcriptome**

309 **a.** The network plot for the overview of pig PCGs. The red nodes represent the types of tissue. Yellow, blue  
310 and green nodes respectively represent the number of the gene that expressed in all tissues, tissue-enriched  
311 and group-enriched. Where, G1-47 respectively means immune organs, female reproductive system, male  
312 reproductive system, Liver and gall bladder, Adrenal gland and thymus gland, Muscle tissues, Brain tissues.

313 **b.** Numbers of tissue-enriched isoforms for known and unknown protein isoforms.

314 **c.** Numbers of group-enriched isoforms in different tissue groups.

315 **d.** The group-enriched expression of *MYL3* gene in muscular system. The gene levels (FPKM) for *MYL3* gene  
316 from different tissue categories (muscular system and non-muscular system) between humans and pigs.

317 **e.** The group-enriched expression of *ENCI* gene in brain tissue. The gene levels (FPKM) for *ENCI* gene from  
318 different tissue categories (brain and brain tissue) between humans and pigs.

319 **f.** Expression landscape of ubiquitously expressed genes in 34 tissues.

320 **g.** Hierarchical cluster tree for all ubiquitously expressed genes. 24 modules correspond to branches are  
321 labelled by 24 different colours.

322 **Subcellular characterization of the unknown pig proteome**

323 Proteins with different subcellular locations usually play different roles in physiological and pathological  
324 processes. To characterize these unknown pig proteins at the subcellular level, we performed a proteome-wide  
325 subcellular classification for all identified pig protein isoforms ( $n = 24,431$ ) based on the existing prediction  
326 methods(Uhlen et al. 2015) (as described in Materials and Methods). We found a major fraction (72.66%) of  
327 pig protein isoforms were predicted to be soluble protein isoforms, followed by 21.55% of membrane protein  
328 isoforms and 5.79% of secreted protein isoforms (Figure 5a; Table S5). For an in-depth comparative analysis  
329 on PCGs, we further clustered all available protein isoforms into four base categories including 14,890 soluble  
330 proteins, 3,924 membrane proteins, 1,053 secreted proteins, as well as 47 membrane & secreted proteins (Table  
331 S6). As shown in Figure 5b, there are only 2.4% of PCGs ( $n=416$ ) with isoforms belong to two or more  
332 categories, which is far less than the 19.3% of PCGs ( $n=3,917$ ) with the similar type of isoforms in human  
333 (Uhlen et al. 2015). It is worth noting that the novel protein isoforms (86.74%) has a greater proportion of  
334 soluble proteins than known protein isoforms (71.49%). The results showed that the solubility of soluble  
335 proteins in liquids may be one of the reasons that due to some proteins were missed in current pig proteome.

336 More interestingly, we found that the organ or tissue function were also related to subcellular of their  
337 expressed proteins. Ranking all of identified proteins by their zFPKM value for each tissue, we selected the  
338 top 1% to represent their main proteins. As shown in Figure 5c, the higher proportion of membrane proteins

339 were associated with nervous tissues, such as spinal cord, brain, retina. Besides, muscle tissues have a higher  
 340 proportion in soluble protein, and the higher proportion of secreted proteins were represented by higher  
 341 expression especially in some secretory tissues, such as liver, uterus, pancreas, gall bladder, gut *etc.*

342 Besides, similar to human proteome(Uhlen et al. 2015), these highly expressed protein especially in  
 343 secretory tissues were usually tend to the secreted components and representative to the tissue function (Figure  
 344 5d). For example, the *ALB* (albumin) gene codes a secreted protein with the highest expression seen in liver  
 345 tissue of adult and infancy pig, with its main function being in the regulation of blood plasma colloid osmotic  
 346 pressure. Whereby we further predicted the potential function of these unknown isoforms by referring to well-  
 347 annotated gene that having the parallel expression pattern and subcellular components. For example, both of  
 348 LOC100620249 and *PGC* (Progastricsin) genes were highly expressed secreted proteins in the stomach tissue,  
 349 and the latter is a known secreted protein and constituting a major component of the gastric mucosa. This  
 350 demonstrates the LOC100620249 more likely plays an important role in gastric mucosa of pig, which provide  
 351 a valuable resource for enhancing studies of pig genomics and biology.

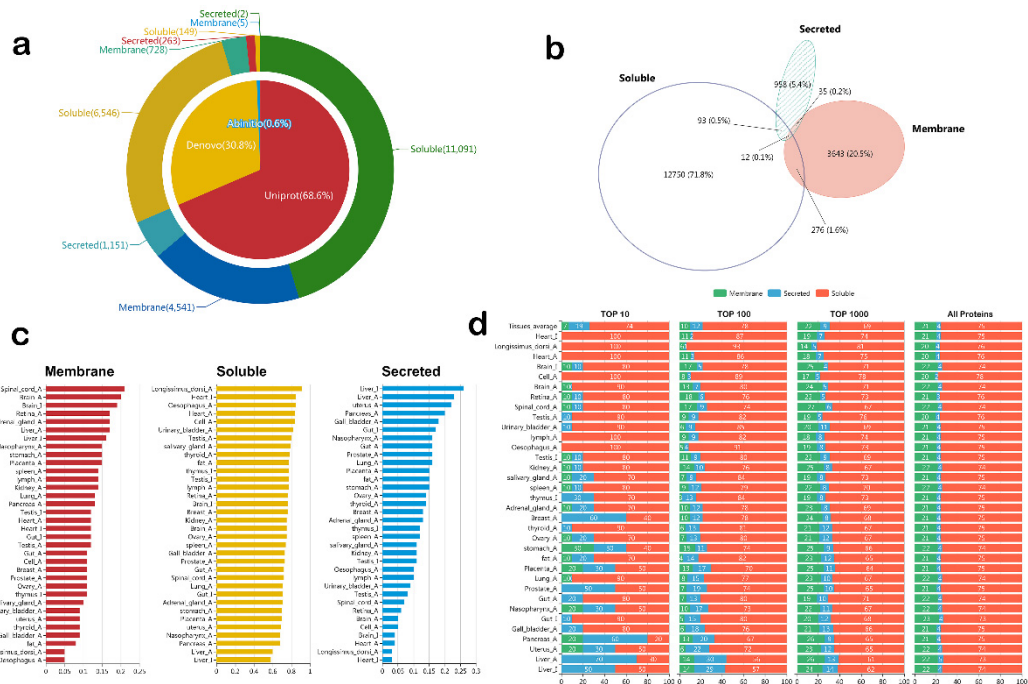

352  
 353 **Figure 5. Classification of subcellular components within pig proteome**  
 354 **a.** Pie charts for subcellular location of pig protein isoforms. Pie charts show the percentage of subcellular  
 355 location for all pig protein isoforms.  
 356 **b.** Venn diagram for subcellular location of pig proteins. Venn diagram reveals the number of genes in each  
 357 of the three main subcellular location categories: membrane, secreted, and soluble. The overlap between the

358 categories gives the number of genes with isoforms belonging to two or all three categories.

359 **c.** The proportion of protein isoforms in 34 tissues to different subcellular components.

360 **d.** The proportion of three subcellular components in 34 tissues. We respectively selected the levels of  
361 expression with top 10, top 100, top 1000 and all proteins as protein sets for each tissue.

### 362 **Inferring orthologous functions of unknown pig proteome across multiple species**

363 To pursue stronger evidence and orthologous functions for these unknown proteins, we further aligned the  
364 sequence of each isoform against the top 10 species databases. We adopted two criteria to identify homologous  
365 sequences to the newly identified swine proteins with those of other species: (1) percent identity is greater  
366 than 80%; (2) length of homologous sequence is longer than 80% of the swine protein sequence.  
367 Consequentially, 3,656 out of 7,319 (49.95%) unknown protein isoforms were inferred to have orthologous in  
368 other species. 90.29% orthologous isoforms ( $n=3,301$ ) were identified in at least other two species, while 36.95%  
369 of orthologous isoforms ( $n=1,351$ ) were the common isoforms for 9 (Chicken) or all 10 species (Figure 6a).  
370 Interestingly, Even the novel protein isoforms still have 41.72% of the orthologous protein isoforms ( $n=1,545$ )  
371 with other species, and almost 65.3% ( $n=1,009$ ) of them were mapped in the pig genome (*Sus scrofa* 11.1)  
372 (Figure 6b). The result indicated that the exploited novel proteins herein can be considered as the reliable  
373 proteome data that significantly enhances both the pig genome annotation and the current pig protein database  
374 with convincing evidence.

375 In addition, compared with the existing orthologues in omabrowser (<http://omabrowser.org>) and current  
376 genome sequences, 3,656 of the unknown protein isoforms enriched 14,837 novel pairwise orthologous  
377 relationships between pigs and other species (Table S7). These pairwise orthologous relationships of proteins  
378 between pigs and other species provided a feasible way to investigate the potential function of corresponding  
379 PCGs in the pig genome if these homologous proteins have been well studied in other species. Therefore,  
380 considering the most complete set of annotated genes in human proteome, we preformed the functional gene  
381 set enrichment for human orthologous proteins of these unknown protein isoforms to speculate their potential  
382 function. A functional Gene Ontology (GO) analysis for these unknown protein isoforms showed that most of  
383 GO term describes of cell and intracellular part (corrected  $P < 0.01$ ), which provide an important supplement  
384 to understand the biological process in pig. Meanwhile, by further examining the functional characterization  
385 of these unknown protein isoforms, we found 65 Kyoto Encyclopedia of Genes and Genomes (KEGG)  
386 pathways were represented in our unknown proteome, mainly involving metabolic pathways (corrected  $P =$   
387  $7.2e^{-19}$ ), focal adhesion (corrected  $P = 3.1e^{-9}$ ), regulation of actin cytoskeleton (corrected  $P = 4.4e^{-8}$ ).  
388 Importantly, we found 25 disease signaling pathways from the KEGG disease database (corrected  $P < 0.05$ )



389 that included the metabolism, nervous system, skeletal, muscular, skin diseases (Figure 6c). These findings  
 390 will help us better recognize the potential function of the unknown pig protein isoforms, and provide a new  
 391 insight into enhancing the value of pigs as a biomedical model for human medicine and as donors for porcine-  
 392 to-human xenotransplantation.

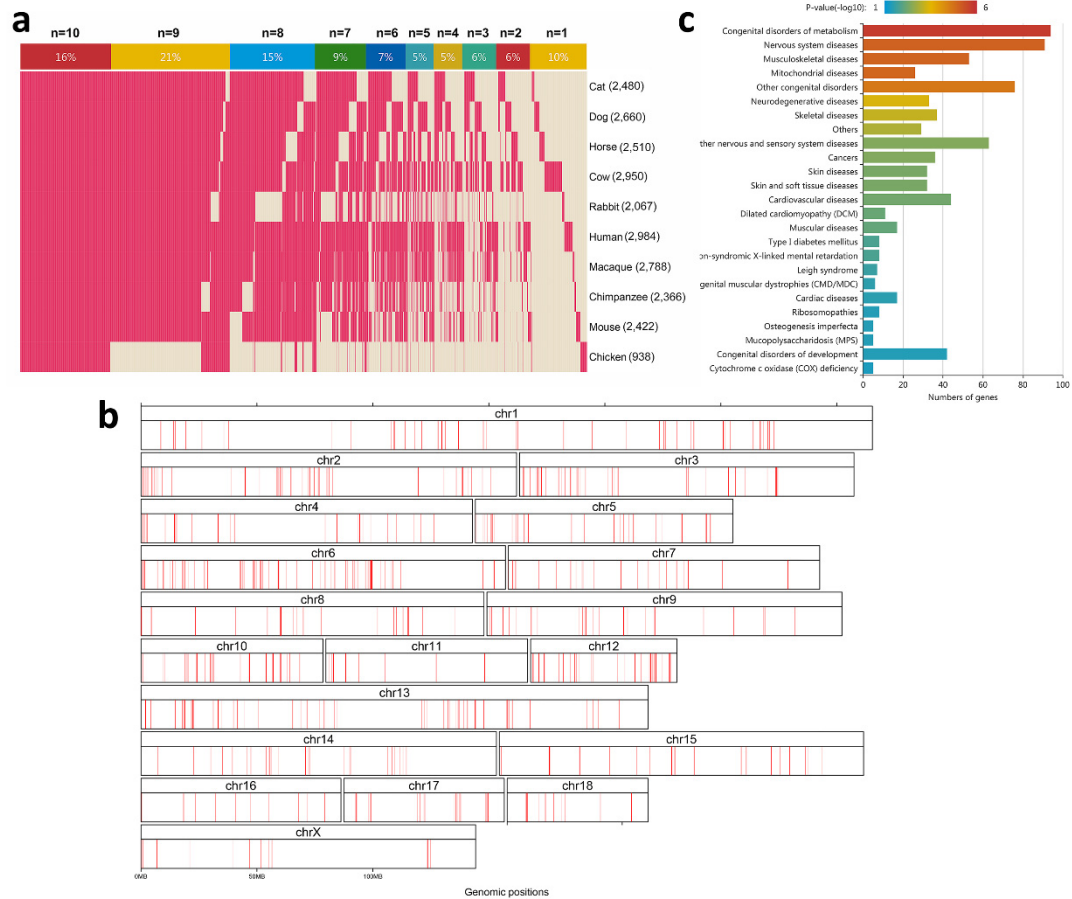

393

394 **Figure 6. Orthologous of unknown pig proteome across multiple species**

395 **a.** The heatmap for showing 3,656 orthologous isoforms among 10 species. For each isoform, the N represent  
 396 the number of species that pigs shared homology with. The percentages within the colour bars mean the  
 397 proportion of genes in all 3,656 homologous isoforms for each “N”.

398 **b.** The distribution of the novel proteins in the pig genome.

399 **c.** 25 KEGG disease pathway for human orthologous proteins of pig novel proteins.

400

401 **Discussion**

402 Here we presented the landscape of a tissue-based proteome for pigs. Our findings not only offered the  
 403 confirmatory evidence for 84.84% of existing pig proteins that have been deposited in the UniprotKB ( $n =$   
 404 16,738), pig PeptideAtlas ( $n = 9,204$ ) and NCBI Protein database ( $n = 17,781$ ), but also identified 3,703 novel

405 protein isoforms which missed in current pig proteome. Besides, we also detected 669 protein isoforms from  
406 uncharacterized LOC genes and 2,947 protein isoforms without NCBI annotation in the current reference *Sus*  
407 *scrofa*11.1 genome. Eventually, a total of 7,319 unknown protein isoforms were exploited to further optimize  
408 the annotation of PCGs for the current pig genome.

409 We systematically characterized unknown protein proteome for their expression features, subcellular  
410 components and orthologous functions, providing a valuable resource for enhancing studies of pig genomics,  
411 as well as offering the opportunities for exploring the potential function of these unknown proteins. Our  
412 findings clearly showed that the missing protein annotation in previous studies was due to the two aspects: (1)  
413 low-quality assembly in *Sus scrofa*10.2 genome, and (2) the specific features that low expression levels, tissue  
414 specificity, and greater proportion of soluble components in novel protein isoforms. The in-depth identification  
415 and subcellular characterization of proteome using multiple tissues make it feasible to develop a tissue-based  
416 pig proteome map and facilitate studies of functional genomics and relevant fields. We effectively improved  
417 genome annotation for 5,027 unknown protein isoforms (excluding LOC genes) by mapping their protein  
418 sequence to current pig genome (*Sus scrofa*11.1), of which 4,819 were assigned to chromosomes and 208 were  
419 resided on 33 unplaced scaffolds.

420 High-resolution profiling of pig transcriptome allows us to further reveal 1,746 unknown protein  
421 isoforms that display a tissue- (1,694) or group-enriched (52) function expression pattern. Besides, 507 of  
422 unknown protein isoforms were ubiquitously expressed in 34 tissues, which raised 9.8% of the potential  
423 “housekeeping” gene in the pig genome. These findings provide new insight into understanding the molecular  
424 function of the respective tissue or organ. Further inferring the biological function of unknown pig proteome  
425 by human orthologous proteome, we found that these unknown protein isoforms were enriched in 65 KEGG  
426 pathways and 25 disease signaling pathways, including the pathways involved in disease of concern for human  
427 medicine, such as metabolism, nervous system, skeletal, muscular and skin diseases.

428 The integrated data of proteome and transcriptome in the 34 pig tissues herein were presented in  
429 Supplemental file 2, and 7,319 unknown protein isoforms with corresponding genomic locations, expression  
430 landscapes, subcellular characterizations, orthologous proteins and predicted functions were also summarized  
431 in Table S8. All findings herein will provide the valuable insight and resources for enhancing studies of pig  
432 genomics and biomedical model application to human medicine in the future.

### 433 **Conclusions**

434 We have profiled a draft map of pig proteome and identified 7,319 unknown protein isoforms using 34 major  
435 normal pig tissues. Further we functionally annotated novel protein isoforms through profiling the pig

436 transcriptome with high-throughput RNA sequencing (RNA-seq) of the same pig tissues, improving the  
437 genome annotation of corresponding protein coding genes. We predicted the tissue related subcellular  
438 components and potential function for these unknown proteins. Finally, we mined orthologous genes of  
439 unknown protein isoforms across multiple species and revealed important disease signaling pathways. Our  
440 study enhances the pig genome annotation and contributes to accelerating biomedical research for porcine-to  
441 human xenotransplantation.  
442

## 443 **Methods and Materials**

### 444 **Sample acquisitions**

445 Pig tissue samples and PBMC used for protein identification and mRNA expression analyses were collected  
446 from the Ninghe breeding pig farm in Tianjin, China. For purpose of generating a profiles of transcriptome  
447 and proteome of all major organs and tissues in pig, we totally collected 34 samples (i.e., 33 pooled tissues  
448 and the PBMC) from the nine unrelated Duroc pigs, including three adult male pigs and three female pigs at  
449 200 to 240 days of age, as well as three male piglets (infancy) at 21 to 25 days of age. All pig tissues were  
450 histologically confirmed to be normal and healthy by an experienced pathologist. An overview of all  
451 involved tissue and cell samples is provided in Table S1.

### 452 **Preparation pig samples**

453 All samples were snap frozen within the first 20 minutes after slaughter and stored in liquid nitrogen (-196°C)  
454 until usage. PBMC were isolated using Ficoll-Hypaque PLUS (GE Healthcare), following the manufacturer's  
455 instructions. In brief, the whole blood was first diluted by an equal volume of phosphate buffer solution (PBS).  
456 Then, 20 ml of diluted blood was carefully added on top of 10 ml of Ficoll-Hypaque solution in a 50 ml conical  
457 tube and centrifuged at 460 g for 20 min at room temperature. After centrifugation, the middle whitish interface  
458 containing mononuclear cells was transferred to a new tube, and washed by PBS followed by centrifugation  
459 at 1000 rpm for 10 min twice.

### 460 **Separation of protein and RNA**

461 Fresh frozen tissue was thawed, cut into small pieces and extensively washed with precooled phosphate  
462 buffered saline. A pool of equal amounts of tissues from three unrelated pigs was homogenized and sonicated  
463 in cold lysis buffer. Extraction of 100 µg protein using protein extraction buffer (8 M urea, 0.1% SDS)  
464 containing an additional 1 mM phenylmethylsulfonyl fluoride (Beyotime Biotechnology, China) and protease  
465 inhibitor cocktail (Roche, USA) was kept on ice for 30 min and then centrifuged at 16,000 × g for 15 min at  
466 4 °C. The supernatant was collected and determined with BCA assay (Pierce, USA) and 10-20% SDS-PAGE.  
467 The cell lysate was stored at -80°C before LC-MS analysis.

468 Total RNA was purified from pooled tissues via the Trizol method (Invitrogen, Carlsbad, CA) according  
469 to standard protocols. RNA degradation and contamination was monitored on 1% agarose gels. The purity and  
470 contamination of total RNA was checked using NanoPhotometer® trophotometer (IMPLEN, CA, USA) and

471 Qubit® RNA Assay Kit in Qubit® 2.0 Fluorometer (Life Technologies, CA, USA). RNA integrity was measured  
472 using the RNA Nano 6000 Assay Kit of the Bioanalyzer 2100 system (Agilent Technologies, CA, USA). All  
473 pig samples that met the criteria of having an RNA Integrity Number (RIN) value of 7.0 or higher and at least  
474 5 µg of total RNA, were included and batched for RNA sequencing.

#### 475 **Library construction and RNA sequencing**

476 Total RNA of samples meeting quality control (QC) criteria were rRNA depleted and depleted QC was done  
477 using the RiboMinus™ Eukaryote System v2 and RNA 6000 Pico chip according to the manufacturer's  
478 protocol. RNA sequencing libraries were constructed using the NEBNext® Ultra™ RNA Library Prep Kit  
479 (Illumina) with 3µg rRNA depleted RNA according to the manufacturer's recommendation. RNA-seq library  
480 preparations were clustered on a cBot Cluster Generation System using HiSeq PE Cluster Kit v4 cBot (Illumina)  
481 and sequenced using the Illumina HiSeq 2500 platform according to the manufacturer's instructions, to a  
482 minimum of 10G reads per sample (corresponding to 125 bp paired-end reads). The sequenced RNA-Seq raw  
483 data for the 34 pig tissues is available from NCBI Sequences Read Archive with the BioProject number:  
484 PRJNA392949.

#### 485 **Fractionation of peptide mixture using a C18 column**

486 Peptide mixture from each sample was first lyophilized and reconstituted in buffer A (2% ACN, 98% H<sub>2</sub>O,  
487 pH10). Then, it was loaded onto a Xbridge PST C18 Column, 130 Å, 5 µm, 250 × 4.6 mm column (Waters,  
488 USA), on the DIONEX Ultimate 3000 HPLC equipped with a UV detector. Mobile phase consists of buffer A  
489 and buffer B (90% ACN, 10% H<sub>2</sub>O, pH10). The column was equilibrated with 100% buffer A for 25 minutes  
490 before sample injection. The mobile phase gradient was set as follows at a flow rate of 1.0 mL/minute: (a) 0–  
491 19.9 min: 0% buffer B; (b) 19.9–20 min: 0–4% buffer B; (c) 20–22 min: 4–8% buffer B; (d) 22–42 min: 8–  
492 20% buffer B; (e) 42–59 min: 20–35% buffer B; (f) 59–60 min: 35–45% buffer B; (g) 60–61min: 45–95%  
493 buffer B; (h) 61–66 min: 95% buffer B; (i) 66–67 min: 95–0% buffer B; (j) 67–91: 0% buffer B. A fraction was  
494 collected every minute from 24 min to 63 min, and a total of 40 fractions collected were then concentrated to  
495 20 fractions, vacuum dried and stored at -80°C until further LC-MS/MS analysis.

#### 496 **Liquid chromatography tandem mass spectrometry**

497 Peptide mixture was analyzed on a Q Exactive instrument (Thermo Scientific, USA) coupled to a reversed  
498 phase chromatography on a DIONEX nano-UPLC system using an Acclaim C18 PepMap100 nano-Trap  
499 column (75 µm × 2 cm, 2 µm particle size, Thermo Scientific, USA) connected to an Acclaim PepMap RSLC  
500 C18 analytical column (75 µm × 25 cm, 2 µm particle size, Thermo Scientific, USA). Before loading, the  
501 sample was dissolved in sample buffer, containing 4% acetonitrile and 0.1% formic acid. Samples were washed

502 with 97% mobile phase A (99.9% H<sub>2</sub>O, 0.1% formic acid) for concentration and desalting. Subsequently,  
503 peptides were eluted over 85 min using a linear gradient of 3–80% mobile phase B (99.9% acetonitrile, 0.1%  
504 formic acid) at a flow rate of 300 nL/min using the following gradient: 3% B for 5 min; 3–5% B for 1 min; 5–  
505 18% B for 42 min; 18–25% B for 11 min; 25–30% B for 3 min; 30–80% B for 1 min; hold at 80% B for 5 min;  
506 80–3% B for 0.5 min; and then hold at 3% B for 21.5 min. High mass resolution and higher-energy collisional  
507 dissociation (HCD) was employed for peptide identification. The nano-LC was coupled online with the Q  
508 Exactive mass spectrometer using a stainless steel emitter coupled to a nanospray ion source. The eluent was  
509 sprayed via stainless steel emitters at a spray voltage of 2.3 kV and a heated capillary temperature of 320°C.  
510 The Orbitrap Elite instrument was operated in data-dependent mode, automatically switching between MS and  
511 MS<sub>2</sub>. Mass spectrometry analysis was performed in a data dependent manner with full scans (350-1,600 m/z)  
512 acquired using an Orbitrap mass analyzer at a mass resolution of 70,000 at 400 m/z on Q Exactive using an  
513 automatic gain control (AGC) target value of 1×10<sup>6</sup> charges. All the tandem mass spectra were produced by  
514 HCD. Twenty most intense precursor ions from a survey scan were selected for MS/MS from each duty cycle  
515 and detected at a mass resolution of 17,500 at m/z of 400 in Orbitrap analyser using an AGC target value of  
516 2×10<sup>5</sup> charges. The maximum injection time for MS<sub>2</sub> was 100 ms and dynamic exclusion was set to 20s.

#### 517 **Validation of identified Proteins**

518 In total, 71 peptides from 31 proteins (7 known proteins, 11 homologous novel proteins, 13 non-homologous  
519 novel proteins) were randomly selected for peptide synthesis (GL biochem) for validation of identified proteins.  
520 The synthesized peptide sequences were mixed and were processed twice by chromatographic separation using  
521 the Thermo EASY-nLC HPLC system and Thermo scientific EASY column. Mass spectral analysis was then  
522 performed by Q-Exactive (Thermo Scientific) and processed by Mascot V2.2. Finally, all these peptides were  
523 compared with those identified from our proteome analysis to verify novel proteins.

#### 524 **QC processing**

525 We conducted a quality control step on raw fastq reads for efficient and accurate RNA-seq alignment and  
526 analysis. In this step, raw reads were cleaned up for downstream analyses using the following steps: BBDuk  
527 (<http://sourceforge.net/projects/bbtools/>)(Bushnell 2014) automatically detected and removed adapter  
528 sequences; FASTQC (<http://www.bioinformatics.babraham.ac.uk/projects/fastqc/>) calculated the Q20, Q30  
529 and GC content of the clean data for quality control and filtering; FASTX-Toolkit  
530 ([http://hannonlab.cshl.edu/fastx\\_toolkit/](http://hannonlab.cshl.edu/fastx_toolkit/)) carried out homopolymer trimming to the 3' end of fragments and  
531 removed the N bases from the 3' end.

532 **Read mapping and assembly**

533 RNA-seq data were mapped and genome indexed with Hisat 0.1.6-beta 64-bit(Kim et al. 2015) to t  
534 he pig genome release version *Sus scrofa*11.1 ([ftp://ftp.ncbi.nlm.nih.gov/genomes/all/GCF/000/003/025/  
535 GCF\\_000003025.6\\_Sscrofa11.1/](ftp://ftp.ncbi.nlm.nih.gov/genomes/all/GCF/000/003/025/GCF_000003025.6_Sscrofa11.1/)). *Sus scrofa*11.1 annotation was used as the transcript model referenc  
536 e for the alignment, splice junction identification and for all protein-coding gene and isoform expres  
537 sion-level quantifications. To obtain expression levels for all pig genes and transcripts across all 34  
538 samples, FPKM values were calculated using Stringtie 1.0.4 (Linux\_x86\_64)(Pertea et al. 2015). A  
539 gene or transcript was defined as expressed if it's FPKM value was measured less than 0.1 across  
540 all tissues. For each tissue, we applied zFPKM normalization method(Hart et al. 2013) to generate  
541 high-confidence estimates of gene expression.

542 **zFPKM level-based classification of genes**

543 Refer to the gene classification in human, we also classified the pig genes into one of three categories based  
544 on the zFPKM levels in 34 samples: (1). "Tissue enriched" – only detected in single tissue, as well as at least  
545 5-fold higher at the zFPKM level in one tissue compared to the tissue with a second highest expression. (2).  
546 "Group enriched" – the gene detected in all tissues from a groups, and the expression of genes in any tissue  
547 from the groups is higher than the tissue that not from the group. (3). "Expressed in all tissues" – detected in  
548 all 34 tissues.

549 **Construction of a reference protein database**

550 To identify novel protein and improve existing proteins annotations in the pig genome, the database for protein  
551 searching (MS/MS data searched against protein database) was taken from four different levels using in-house  
552 perl scripts, including: (1). UniProt database (*Sus scrofa*) (2). Three-frame-translated mRNA de novo  
553 sequences from the current study (3). Six-frame-translated pig genome database. The details are as follows:

554 Primary database of proteins: Resource protein data sets for pig (UniProt version 20150717 containing  
555 34,131 entries, with 1,486 Swiss-Prot, 32,643 TrEMBL) were downloaded from the UniProt database  
556 (<http://www.uniprot.org/>).

557 Secondary database of proteins: It is well known that pig proteins of insufficiently represented by  
558 detectable known proteins, because of the incomplete nature of the pig genome assembly and limited  
559 annotation. In our study, three RNA resources were used (Table S9): (1). EST datasets including 34,131 entries  
560 from UCSC (<http://hgdownload.soe.ucsc.edu/goldenPath/susScr3/bigZips/>) and 1,676,406 entries from the  
561 NCBI database (<http://www.ncbi.nlm.nih.gov/nucest>). ESTs are normally assembled into longer consensus  
562 sequences for three-frame-translated mRNA protein database using iAssembler version 1.3.2.x64(Zheng et al.

563 2011) with default parameter. (2). Paired-End (PE) read libraries including 34 RNA sequencing libraries from  
564 our study and 7 previously published article and NCBI database. To construct a complete protein database for  
565 three-frame-translated mRNA, we used Trinity (version 2.0.6)(Grabherr et al. 2011) for *de novo* transcriptome  
566 assembly from RNA-Seq data, and identified potential coding regions within Trinity-reconstructed transcripts  
567 by TransDecoder (developed and include with Trinity). (3). Single-end (SE) reads from 10 previous studies  
568 were downloaded from NCBI (<http://www.ncbi.nlm.nih.gov/sra/>). The method for sequence assembly and  
569 coding region prediction were similar to that used for the paired-end (PE) reads.

570 Tertiary database of proteins: To capture the proteins missed during the laboratory discovery process as  
571 far as possible, protein annotation of the pig genome was carried out using the ab initio methods with GeneScan  
572 software(Ramakrishna and Srinivasan 1999). Finally, we used BLASTP to identify proteins and remove  
573 duplicates between different protein databases (Retention order: UniProt > De novo > Ab initio).

#### 574 **Peptide identification based on database searching**

575 All MS/MS samples were analyzed using Mascot (Matrix Science, London, UK; version 2.5.1)(Sadeh et al.  
576 1999) and X!Tandem (The GPM, [thegpm.org](http://thegpm.org); version CYCLONE (2010.12.01.1))(Craig and Beavis 2004).  
577 Mascot was set up to search the pig databases (UniProt, de novo, Assembly, ab initio database) and the cRAP  
578 database (common Repository of Adventitious Proteins; download date: 07 Jul 2015; 116 sequences) assuming  
579 the digestion enzyme trypsin.

580 The high resolution peaklist files were converted into Mascot generic format (mgf) prior to database  
581 searching. X!Tandem was set up to search a subset of the pig databases, also assuming trypsin. The target-  
582 decoy option of Mascot and X!Tandem were enabled (decoy database with reversed protein sequences).  
583 Mascot and X!Tandem were used to search with a fragment ion mass tolerance of 0.050 Da and a parent ion  
584 tolerance of 10.0 PPM. Carbamidomethyl of cysteine was specified in Mascot and X!Tandem as a fixed  
585 modification. Gln- > pyro-Glu of the n-terminus, oxidation of methionine and acetyl of the n-terminus were  
586 specified in Mascot as variable modifications. Glu- > pyro-Glu of the n-terminus, ammonia-loss of the n-  
587 terminus, Gln- > pyro-Glu of the n-terminus, oxidation of methionine and acetylation of the n-terminus were  
588 specified in X! Tandem as variable modifications.

589 Scaffold (version Scaffold\_4.4.5, Proteome Software Inc., Portland, OR) was used to validate MS/MS  
590 based peptide and protein identifications. Peptide identifications were accepted if they achieved an FDR < 1%  
591 by the Scaffold Local FDR algorithm. Protein identifications were accepted if they had an FDR < 1% and  
592 contained at least 2 identified peptides. Protein probabilities were assigned by the Protein Prophet algorithm.  
593 Proteins that contained similar peptides and could not be differentiated based on MS/MS analysis alone were



594 grouped to satisfy the principles of parsimony. Proteins sharing significant peptide evidence were grouped  
595 into clusters. In the database searching workflow, unmatched MS/MS spectra generated from the Uniprot  
596 database search were then searched against next level protein database (De novo, Ab initio).

#### 597 **Mapping the protein isoforms to the pig genome**

598 We attempted to map all unknown protein isoforms against the pig genome using MAKER annotation  
599 workflow(Cantarel et al. 2008). First, the low-complexity repeats of pig reference genome were soft-masked  
600 by RepeatMasker. Then, the unknown protein isoforms (without LOC genes) were aligned to the masked  
601 reference genome by BLAST(Mount 2007) for identifying their genomic location roughly. Last,  
602 Exonerate(Slater and Birney 2005) was used to realign and polish the exon–intron boundaries of the unknown  
603 gene with the splice-site aware alignment algorithm. The house-python script being used to deal with the result:  
604 if a successfully aligned protein had 95% identity overall, 95% coverage and the distance from its neighboring  
605 exon being less than 50Kb, it was recorded to be an effectively aligned sequence.

#### 606 **Subcellular prediction and classification of pig proteome**

607 The prediction of pig membrane proteins was carried out similarly to how these proteins were classified in the  
608 human proteome. A total of seven methods were used to identify membrane protein topology with different  
609 assessment algorithms, for example, topological models, neural networks, support vector machines (SVMs),  
610 scale of free energy contributions and hidden Markov models (HMMs): MEMSAT3(Jones 2007), MEMSAT-  
611 SVM(Nugent and Jones 2009), SPOCTOPUS(Viklund et al. 2008), THUMBUP(Zhou and Zhou 2003),  
612 SCAMPI multi-sequence-version(Bernsel et al. 2008), TMHMM(Sonnhammer et al. 1998), and Phobius  
613 version 1.01(Kall et al. 2004). In our study, the proteins were assigned as transmembrane if they were predicted  
614 by at least four out of the seven methods.

615 In accordance with human secretome analysis, the prediction of signal peptides (SP) was based on Neural  
616 Networks and Hidden Markov models with three software programs: SignalP4.0(Petersen et al. 2011),  
617 SPOCTOPUS and Phobius version 1.01. The proteins, predicted by at least two out of the three methods, to  
618 contain a signal peptide were classified as potentially secreted.

619 Integrating the prediction of pig membrane proteins and prediction of pig secretome proteins, we  
620 classified each pig protein into one of three classes: secreted, membrane or soluble (neither membrane nor  
621 secreted protein). In order to compare the proteome between pig and human conveniently, we also constructed  
622 four major categories for classifications of the protein-coding genes with multiple protein isoforms: (1).  
623 “soluble” just containing soluble category (2). “secreted” were combined with the soluble/secreted and the  
624 secreted (3). “membrane” including soluble/membrane and the membrane groups (4). “membrane and secreted

625 isoforms” containing secreted/membrane and soluble/secreted/membrane groups.

### 626 **Weighted gene co-expression network analysis**

627 In order to reveal the groups of protein coding genes that are functionally related in the whole pig organism,  
628 34 pig tissue data sets were constructed using the WGCNA method. In our study, we mainly used the  
629 blockwiseModules function in the WGCNA R package(Langfelder and Horvath 2008) to perform the  
630 coexpression network construction, with the following parameters: corType = pearson, maxBlockSize =  
631 30,000, power = 8, minModuleSize = 30, mergeCutHeight = 0.1. The brief function of blockwiseModules  
632 automatically constructed a correlation network, created a cluster tree, defined modules as branches, merged  
633 close modules, and yielded the module colors and module eigen genes for subsequent analysis (such as  
634 visualization by the plotDendroAndColors function).

### 635 **Functional annotations for pig PCGs**

636 Gene ontology (GO) analysis and KEGG (<http://www.genome.jp/kegg/>) pathway enrichment analysis were  
637 performed with KOBAS 3.0 ([http://kobas.cbi.pku.edu.cn/anno\\_iden.php](http://kobas.cbi.pku.edu.cn/anno_iden.php)). GO terms appearing in this study  
638 are summarized within three categories: cell component, molecular function and biological process. In view  
639 of the most complete genes annotation in human genome, we gave priority to those human annotated genes  
640 which were homologous to pig genes and utilized them as the background.

### 641 **Availability of data and material**

642 The sequenced RNA-Seq raw data for the 34 pig tissues is available from NCBI Sequences Read Archive  
643 with the BioProject number: PRJNA392949. The pig proteomic data was deposited in PRIDE with the  
644 Project Accession was PXD006991.

### 645 **Additional files**

#### 646 **Figure S1-14: Quality assessment of protein identification.**

647 S1-S3. Density distribution for number of unique peptide at the region from 0 to 10, 0 to 20 and 0 to 50  
648 respectively.

649 S4-S6. Density distribution for number of unique spectrum at the region from 0 to 10, 0 to 20 and 0 to 50  
650 respectively.

651 S7-S9. Density distribution for number of spectrum counts at the region from 0 to 10, 0 to 20 and 0 to 50  
652 respectively.

653 S10. Density distribution for identification probability.

654 S11. The bar plot for number of protein with different peptide bins.

655 S12. The bar plot for number of protein with different coverage bins among 34 tissues.

656 S13. The bar plot for number of protein with different tissues among 10 coverage bins.

657 S14. The bar plot for number of protein with different coverage bins.

658 **Supplemental tables: Table S1-S9 (XLSX)**

659 Table S1 Validation of 71 peptides from 31 proteins

660 Table S2 Overview of alignment within 34 tissues

661 Table S3 Gene expression patterns in 34 tissues

662 Table S4 The co-expression interactions of 6,163 ubiquitously expressed gene

663 Table S5 Subcellular location of the pig proteome (isoform)

664 Table S6 Subcellular location of the pig proteome (protein)

665 Table S7 Details of homologous protein with 10 species

666 Table S8 Overview of functionally predictive resource for 7,319 unknown protein isoforms

667 Table S9 RNA-seq resource tables

668 **Supplemental file 1:** Validation of identified proteins: MS/MS spectra from 71 synthetic peptides with those  
669 obtained from analysis of pig tissues.

670 **Supplemental file 2:** The fasta file of 3,703 novel protein isoforms.

671 **List of Abbreviations**

672 RNA-seq: RNA sequencing; PCGs: protein-coding genes; LC-MS/MS: liquid chromatography tandem mass

673 spectrometry; EST: expressed sequence tag; PSMs: peptide spectrum matches; FDR: false discovery rate;

674 PBMC: peripheral blood mononuclear cells; GO: Gene Ontology; KEGG: Kyoto Encyclopedia of Genes and

675 Genomes; RIN: RNA Integrity Number

#### 676 **Ethics approval and consent to participate**

677 All procedures involving animals were performed by a licence holder in accordance with the protocol

678 approved by the Institutional Animal Care and Use Committee (IACUC) of China Agricultural University

679 (Beijing, People's Republic of China, permit number: DK1023).

#### 680 **Consent for publication**

681 Not applicable.

#### 682 **Funding**

683 This work was financially supported by the National Natural Science Foundations of China (31661143013),

684 National High Technology Research and Development Program of China (863 Program, 2013AA102503)

685 and the Program for Changjiang Scholar and Innovation Research Team in University (IRT1191).

#### 686 **Competing interests**

687 The authors declare that they have no competing interests.

#### 688 **Authors' contributions**

689 J-F.L. conceived and designed the experiments. P.Z. performed transcriptome and proteome analyses. C.D.,

690 H.K. and L.Z. performed pathway analysis and graphic design. X.Z., J.L., C.N., H.W. and Y.C. collected

691 samples and prepared for sequencing. X.Z. and W.F. assisted the experimental validations. J-F.L., P.Z., J.S.,

692 Z.H., G.L., W.W., Y.Y., B.L., and J.S. wrote and revised the paper. All authors read and approved

693 the final manuscript.

694 **Acknowledgements**

695 We thank Ziyao Fan, Yichun Dong and Kaijie Yang for samples collection.

696

697 **References**

698

699 Agarwala A, Billheimer J, Rader DJ. 2013. Mighty minipig in fight against cardiovascular disease. *Sci*  
700 *Transl Med* **5**(166): 166fs161.

701 Bernsel A, Viklund H, Falk J, Lindahl E, von Heijne G, Elofsson A. 2008. Prediction of membrane-protein  
702 topology from first principles. *Proc Natl Acad Sci U S A* **105**(20): 7177-7181.

703 Bjarkam CR, Nielsen MS, Glud AN, Rosendal F, Mogensen P, Bender D, Doudet D, Moller A, Sorensen JC.  
704 2008. Neuromodulation in a minipig MPTP model of Parkinson disease. *Br J Neurosurg* **22**  
705 **Suppl 1**: S9-12.

706 Bushnell B. 2014. BBMap: a fast, accurate, splice-aware aligner.

707 Cantarel BL, Korf I, Robb SM, Parra G, Ross E, Moore B, Holt C, Sanchez Alvarado A, Yandell M. 2008.  
708 MAKER: an easy-to-use annotation pipeline designed for emerging model organism genomes.  
709 *Genome Res* **18**(1): 188-196.

710 Chen F, Wang T, Feng C, Lin G, Zhu Y, Wu G, Johnson G, Wang J. 2015. Proteome Differences in Placenta  
711 and Endometrium between Normal and Intrauterine Growth Restricted Pig Fetuses. *PLoS One*  
712 **10**(11): e0142396.

713 Consortium EP. 2012. An integrated encyclopedia of DNA elements in the human genome. *Nature*  
714 **489**(7414): 57-74.

715 Cooper DK. 2012. A brief history of cross-species organ transplantation. *Proceedings (Baylor University*  
716 *Medical Center)* **25**(1): 49.

717 Cooper DK, Ezzelarab MB, Hara H, Iwase H, Lee W, Wijkstrom M, Bottino R. 2016. The pathobiology of  
718 pig-to-primate xenotransplantation: a historical review. *Xenotransplantation* **23**(2): 83-105.

719 Craig R, Beavis RC. 2003. A method for reducing the time required to match protein sequences with  
720 tandem mass spectra. *Rapid Commun Mass Spectrom* **17**(20): 2310-2316.

721 Craig R, Beavis RC. 2004. TANDEM: matching proteins with tandem mass spectra. *Bioinformatics* **20**(9):  
722 1466-1467.

723 Ekser B, Markmann JF, Tector AJ. 2015. Current status of pig liver xenotransplantation. *Int J Surg* **23**(Pt  
724 B): 240-246.

725 Fischer D, Laiho A, Gyenesei A, Sironen A. 2015. Identification of Reproduction-Related Gene  
726 Polymorphisms Using Whole Transcriptome Sequencing in the Large White Pig Population. *G3*  
727 *(Bethesda)* **5**(7): 1351-1360.

728 Grabherr MG, Haas BJ, Yassour M, Levin JZ, Thompson DA, Amit I, Adiconis X, Fan L, Raychowdhury R,  
729 Zeng Q. 2011. Full-length transcriptome assembly from RNA-Seq data without a reference  
730 genome. *Nature biotechnology* **29**(7): 644-652.

731 Hart T, Komori HK, LaMere S, Podshivalova K, Salomon DR. 2013. Finding the active genes in deep RNA-  
732 seq gene expression studies. *BMC Genomics* **14**: 778.

733 Hesselager MO, Codrea MC, Sun Z, Deutsch EW, Bennike TB, Stensballe A, Bundgaard L, Moritz RL,  
734 Bendixen E. 2016. The Pig PeptideAtlas: A resource for systems biology in animal production  
735 and biomedicine. *Proteomics* **16**(4): 634-644.

736 Jones DT. 2007. Improving the accuracy of transmembrane protein topology prediction using  
737 evolutionary information. *Bioinformatics* **23**(5): 538-544.

738 Kall L, Krogh A, Sonnhammer EL. 2004. A combined transmembrane topology and signal peptide  
739 prediction method. *J Mol Biol* **338**(5): 1027-1036.

740 Kim D, Langmead B, Salzberg SL. 2015. HISAT: a fast spliced aligner with low memory requirements. *Nat*

- 741 *Methods* **12**(4): 357-360.
- 742 Kim MS, Pinto SM, Getnet D, Nirujogi RS, Manda SS, Chaerkady R, Madugundu AK, Kelkar DS, Isserlin R,  
743 Jain S et al. 2014. A draft map of the human proteome. *Nature* **509**(7502): 575-581.
- 744 Langfelder P, Horvath S. 2008. WGCNA: an R package for weighted correlation network analysis. *BMC*  
745 *Bioinformatics* **9**: 559.
- 746 Legrain P, Aebersold R, Archakov A, Bairoch A, Bala K, Beretta L, Bergeron J, Borchers CH, Corthals GL,  
747 Costello CE et al. 2011. The human proteome project: current state and future direction.  
748 *Molecular & cellular proteomics : MCP* **10**(7): M111 009993.
- 749 Li Y, Fuchimoto D, Sudo M, Haruta H, Lin QF, Takayama T, Morita S, Nochi T, Suzuki S, Sembon S et al.  
750 2016. Development of Human-Like Advanced Coronary Plaques in Low-Density Lipoprotein  
751 Receptor Knockout Pigs and Justification for Statin Treatment Before Formation of  
752 Atherosclerotic Plaques. *J Am Heart Assoc* **5**(4): e002779.
- 753 Liang YH, Cai B, Chen F, Wang G, Wang M, Zhong Y, Cheng ZM. 2014. Construction and validation of a  
754 gene co-expression network in grapevine (*Vitis vinifera* L.). *Hortic Res* **1**: 14040.
- 755 Lind NM, Moustgaard A, Jelsing J, Vajta G, Cumming P, Hansen AK. 2007. The use of pigs in neuroscience:  
756 modeling brain disorders. *Neuroscience and biobehavioral reviews* **31**(5): 728-751.
- 757 Maher B. 2012. ENCODE: The human encyclopaedia. *Nature* **489**(7414): 46-48.
- 758 Mele M, Ferreira PG, Reverter F, DeLuca DS, Monlong J, Sammeth M, Young TR, Goldmann JM,  
759 Pervouchine DD, Sullivan TJ et al. 2015. Human genomics. The human transcriptome across  
760 tissues and individuals. *Science* **348**(6235): 660-665.
- 761 Mount DW. 2007. Using the Basic Local Alignment Search Tool (BLAST). *CSH protocols* **2007**: pdb top17.
- 762 Nugent T, Jones DT. 2009. Transmembrane protein topology prediction using support vector machines.  
763 *BMC Bioinformatics* **10**: 159.
- 764 Pedersen R, Ingerslev HC, Sturek M, Alloosh M, Cirera S, Christoffersen BO, Moesgaard SG, Larsen N,  
765 Boye M. 2013. Characterisation of gut microbiota in Ossabaw and Gottingen minipigs as  
766 models of obesity and metabolic syndrome. *PLoS One* **8**(2): e56612.
- 767 Perkins DN, Pappin DJ, Creasy DM, Cottrell JS. 1999. Probability-based protein identification by  
768 searching sequence databases using mass spectrometry data. *Electrophoresis* **20**(18): 3551-  
769 3567.
- 770 Perteua M, Perteua GM, Antonescu CM, Chang TC, Mendell JT, Salzberg SL. 2015. StringTie enables  
771 improved reconstruction of a transcriptome from RNA-seq reads. *Nat Biotechnol* **33**(3): 290-  
772 295.
- 773 Petersen TN, Brunak S, von Heijne G, Nielsen H. 2011. SignalP 4.0: discriminating signal peptides from  
774 transmembrane regions. *Nat Methods* **8**(10): 785-786.
- 775 Ramakrishna R, Srinivasan R. 1999. Gene identification in bacterial and organellar genomes using  
776 GeneScan. *Comput Chem* **23**(2): 165-174.
- 777 Ramskold D, Wang ET, Burge CB, Sandberg R. 2009. An abundance of ubiquitously expressed genes  
778 revealed by tissue transcriptome sequence data. *PLoS Comput Biol* **5**(12): e1000598.
- 779 Sadeh NM, Hildum DW, Kjenstad D, Tseng A. 1999. Mascot: an agent-based architecture for coordinated  
780 mixed-initiative supply chain planning and scheduling. In *In Workshop on Agent-Based Decision*  
781 *Support in Managing the Internet-Enabled Supply-Chain, at Agents' 99*. Citeseer.
- 782 Slater GS, Birney E. 2005. Automated generation of heuristics for biological sequence comparison. *BMC*  
783 *Bioinformatics* **6**: 31.
- 784 Sonnhammer EL, von Heijne G, Krogh A. 1998. A hidden Markov model for predicting transmembrane

785 helices in protein sequences. *Proc Int Conf Intell Syst Mol Biol* **6**: 175-182.

786 Uhlen M, Fagerberg L, Hallstrom BM, Lindskog C, Oksvold P, Mardinoglu A, Sivertsson A, Kampf C,  
787 Sjostedt E, Asplund A et al. 2015. Proteomics. Tissue-based map of the human proteome.  
788 *Science* **347**(6220): 1260419.

789 UniProt C. 2015. UniProt: a hub for protein information. *Nucleic Acids Res* **43**(Database issue): D204-  
790 212.

791 Viklund H, Bernsel A, Skwark M, Elofsson A. 2008. SPOCTOPUS: a combined predictor of signal peptides  
792 and membrane protein topology. *Bioinformatics* **24**(24): 2928-2929.

793 Wilhelm M, Schlegl J, Hahne H, Gholami AM, Lieberenz M, Savitski MM, Ziegler E, Butzmann L, Gessulat  
794 S, Marx H et al. 2014. Mass-spectrometry-based draft of the human proteome. *Nature*  
795 **509**(7502): 582-587.

796 Yan S, Tu Z, Liu Z, Fan N, Yang H, Yang S, Yang W, Zhao Y, Ouyang Z, Lai C et al. 2018. A Huntingtin Knockin  
797 Pig Model Recapitulates Features of Selective Neurodegeneration in Huntington's Disease. *Cell*  
798 **173**(4): 989-1002 e1013.

799 Yu X, Shi W, Cheng L, Wang Y, Chen D, Hu X, Xu J, Xu L, Wu Y, Qu J et al. 2016. Identification of a rhodopsin  
800 gene mutation in a large family with autosomal dominant retinitis pigmentosa. *Sci Rep* **6**: 19759.

801 Zheng-Bradley X, Rung J, Parkinson H, Brazma A. 2010. Large scale comparison of global gene expression  
802 patterns in human and mouse. *Genome Biol* **11**(12): R124.

803 Zheng Y, Zhao L, Gao J, Fei Z. 2011. iAssembler: a package for de novo assembly of Roche-454/Sanger  
804 transcriptome sequences. *BMC Bioinformatics* **12**: 453.

805 Zhou H, Zhou Y. 2003. Predicting the topology of transmembrane helical proteins using mean burial  
806 propensity and a hidden-Markov-model-based method. *Protein Sci* **12**(7): 1547-1555.

807 Zhou W, Liotta LA, Petricoin EF. 2012. The spectra count label-free quantitation in cancer proteomics.  
808 *Cancer Genomics Proteomics* **9**(3): 135-142.

809

810



811

## 812 **Figure Legends**

### 813 **Figure 1. Overview of pig transcriptome-based annotation**

814 **a.** 34 pig tissues analyzed in this study. 34 representative normal pig tissues were selected as the resource of  
815 proteome and transcriptome for exploring convincing evidence of putative PCGs, where A and I respectively  
816 represent adult and infancy pig tissue.

817 **b.** The custom pipeline for proteome-based annotation. Four protein database were used for protein searching  
818 based on Mascot and X!Tandem software with the same criteria.

819

### 820 **Figure 2. Characterization of unknown pig protein isoforms**

821 **a.** Confirmation of 24,431 identified protein isoforms by other pig protein databases.

822 **b.** Classification of unknown pig protein isoforms. Bar chart and pie chart respectively show the numbers and  
823 percents of three categories in 7,319 unknown pig protein isoforms.

824 **c.** Relationship between the improvement of genome quality and novel proteins.

825

### 826 **Figure 3. The pig transcriptome in unknown protein isoforms**

827 **a.** Comparison of number of isoforms expressed per gene between humans and pigs. The box plots compare  
828 the number of isoforms expressed per gene within three transcript sets, including known human Ensembl set,  
829 known pig Ensembl set and the newly identified set of this study.

830 **b.** The heatmap for Pearson correlation between 34 tissues. The heatmap was used to reveal the pairwise  
831 correlation between all 34 pig tissues.

832 **c.** Bar chart for tissue-based transcriptomic evidence of unknown protein isoforms. The x-axis represents the  
833 numbers of tissue and the y-axis represents the numbers of protein.

834

### 835 **Figure 4. Expression landscape in pig transcriptome**

836 **a.** The network plot for the overview of pig PCGs. The red nodes represent the types of tissue. Yellow, blue  
837 and green nodes respectively represent the number of the gene that expressed in all tissues, tissue-enriched  
838 and group-enriched. Where, G1-47 respectively means immune organs, female reproductive system, male  
839 reproductive system, Liver and gall bladder, Adrenal gland and thymus gland, Muscle tissues, Brain tissues.

- 840 **b.** Numbers of tissue-enriched isoforms for known and unknown protein isoforms.
- 841 **c.** Numbers of group-enriched isoforms in different tissue groups.
- 842 **d.** The group-enriched expression of *MYL3* gene in muscular system. The gene levels (FPKM) for *MYL3* gene
- 843 from different tissue categories (muscular system and non-muscular system) between humans and pigs.
- 844 **e.** The group-enriched expression of *ENC1* gene in brain tissue. The gene levels (FPKM) for *ENC1* gene from
- 845 different tissue categories (brain and brain tissue) between humans and pigs.
- 846 **f.** Expression landscape of ubiquitously expressed genes in 34 tissues.
- 847 **g.** Hierarchical cluster tree for all ubiquitously expressed genes. 24 modules correspond to branches are
- 848 labelled by 24 different colours.

849

### 850 **Figure 5. Classification of subcellular components within pig proteome**

- 851 **a.** Pie charts for subcellular location of pig protein isoforms. Pie charts show the percentage of subcellular
- 852 location for all pig protein isoforms.
- 853 **b.** Venn diagram for subcellular location of pig proteins. Venn diagram reveals the number of genes in each
- 854 of the three main subcellular location categories: membrane, secreted, and soluble. The overlap between the
- 855 categories gives the number of genes with isoforms belonging to two or all three categories.
- 856 **c.** The proportion of protein isoforms in 34 tissues to different subcellular components.
- 857 **d.** The proportion of three subcellular components in 34 tissues. We respectively selected the levels of
- 858 expression with top 10, top 100, top 1000 and all proteins as protein sets for each tissue.

859

### 860 **Figure 6. Orthologous of unknown pig proteome across multiple species**

- 861 **a.** The heatmap for showing 3,656 orthologous isoforms among 10 species. For each isoform, the N represent
- 862 the number of species that pigs shared homology with. The percentages within the colour bars mean the
- 863 proportion of genes in all 3,656 homologous isoforms for each “N”.
- 864 **b.** The distribution of the novel proteins in the pig genome.
- 865 **c.** 25 KEGG disease pathway for human orthologous proteins of pig novel proteins.

866

**a**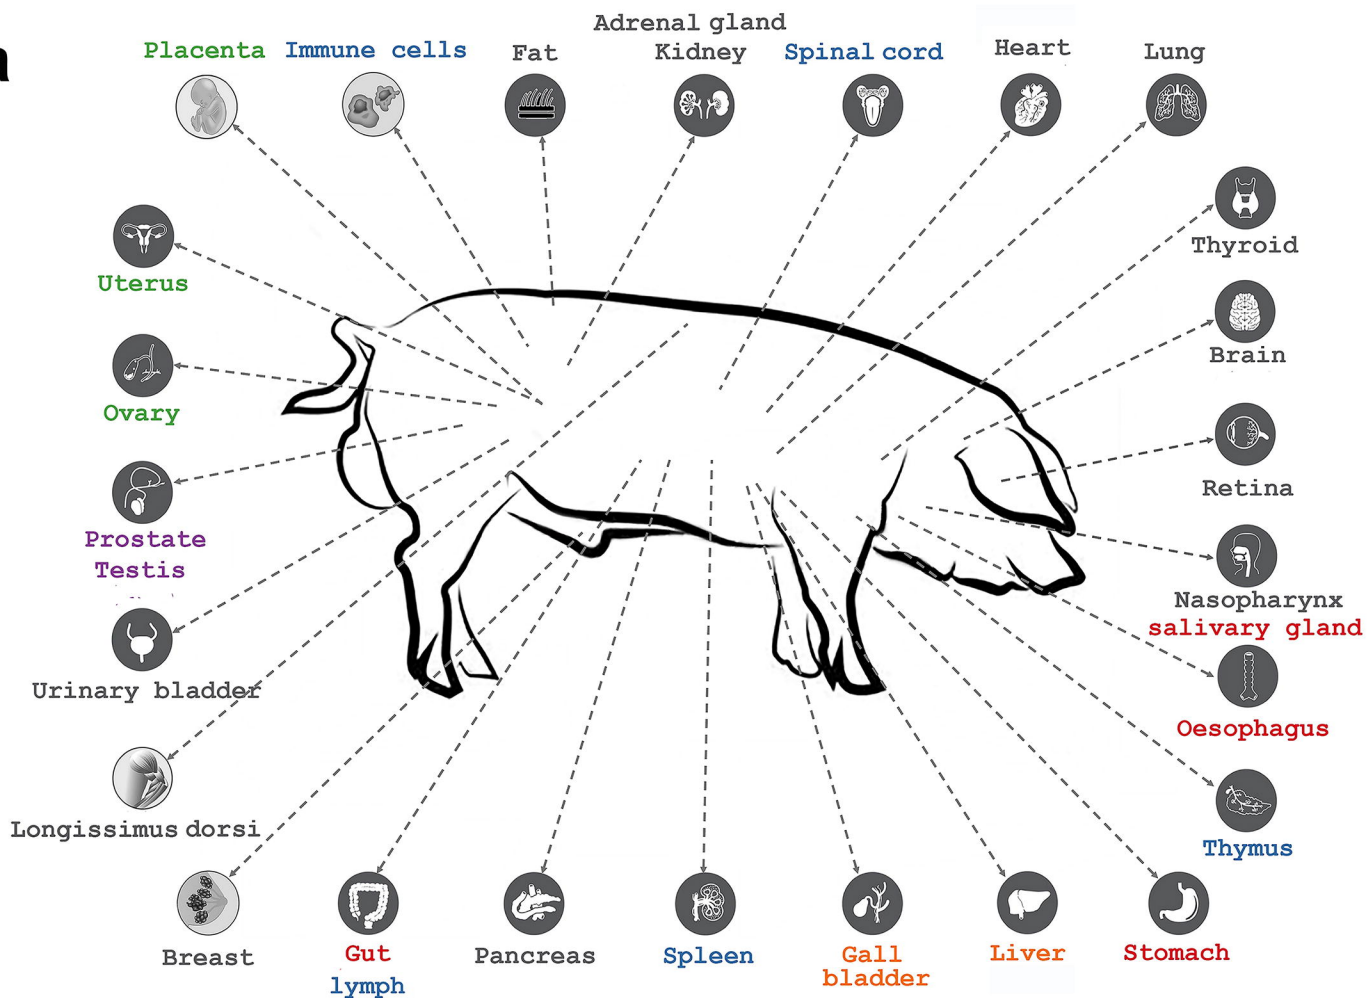**b**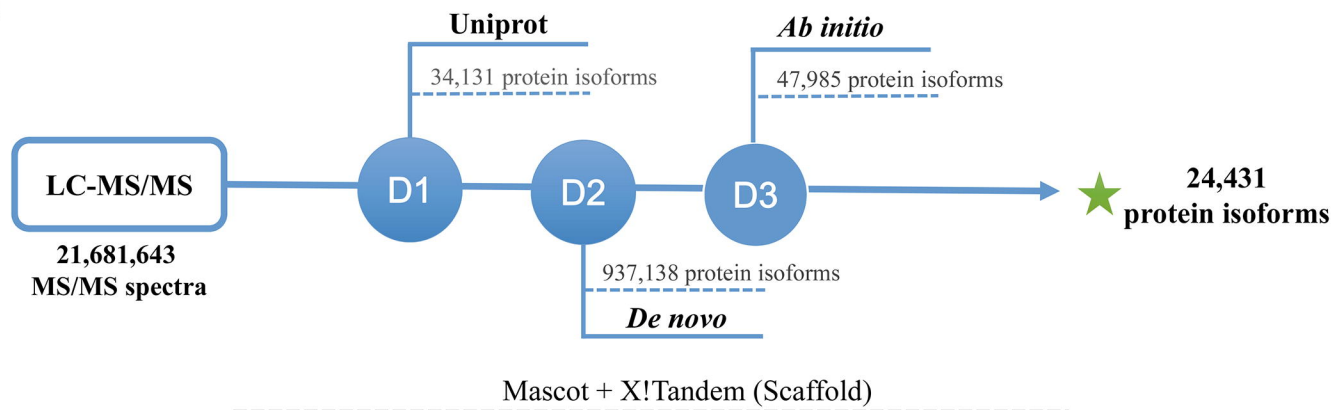

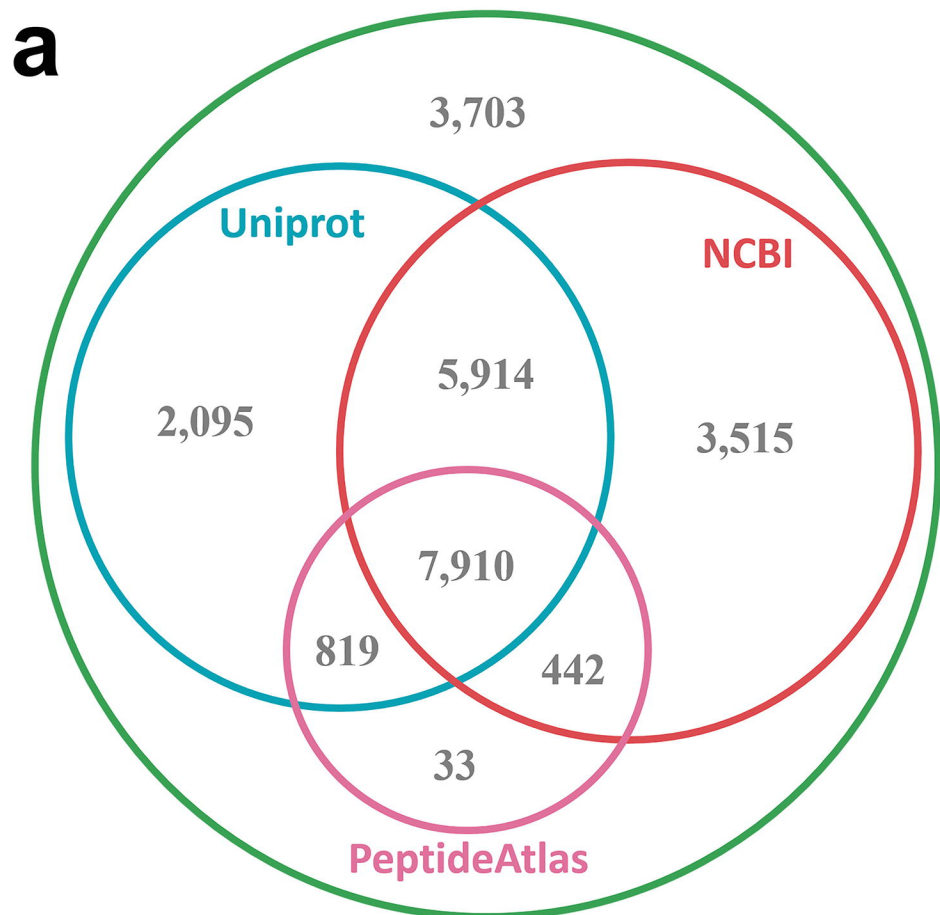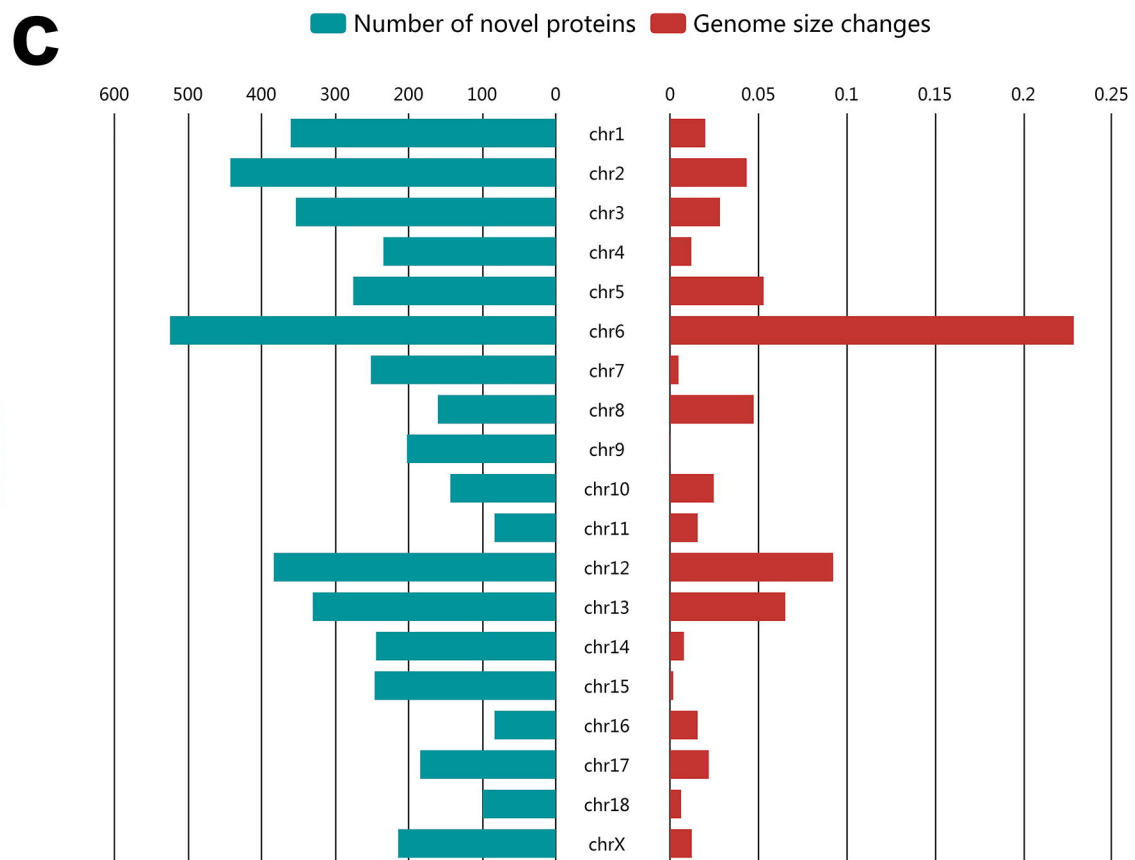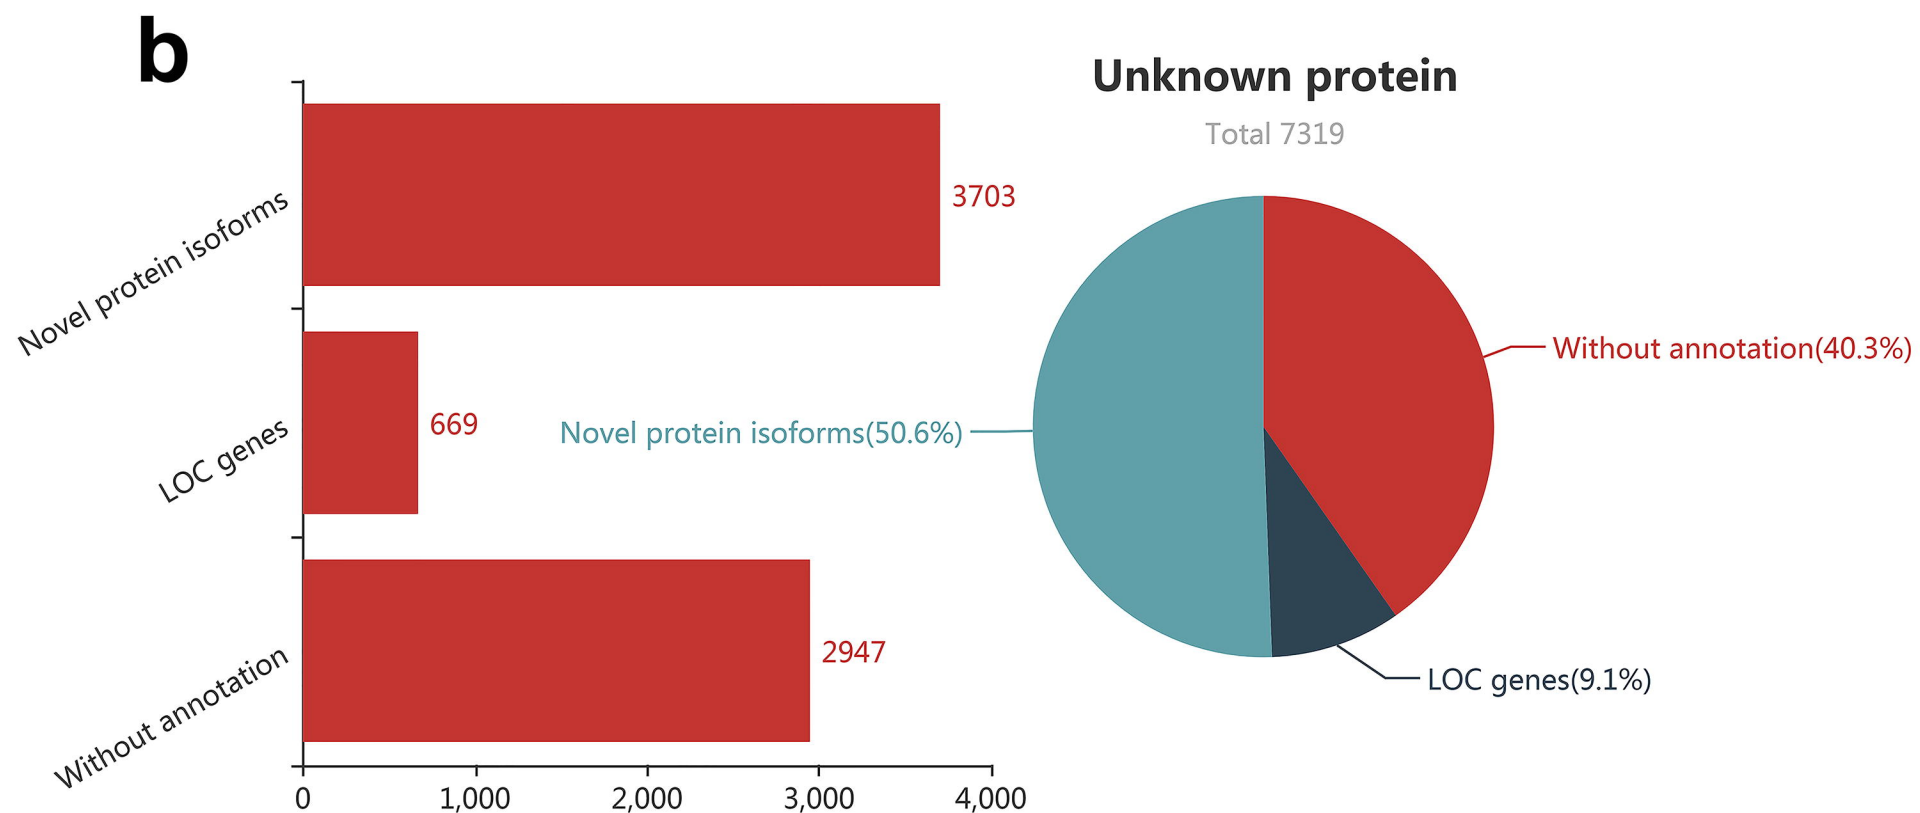

**a**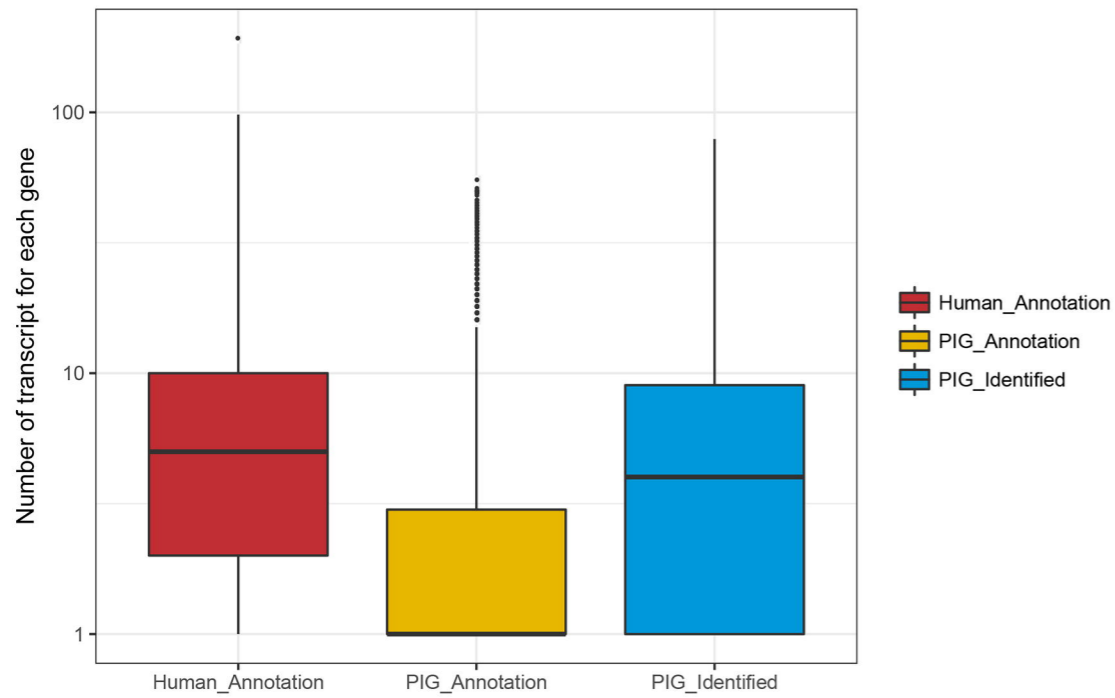**b**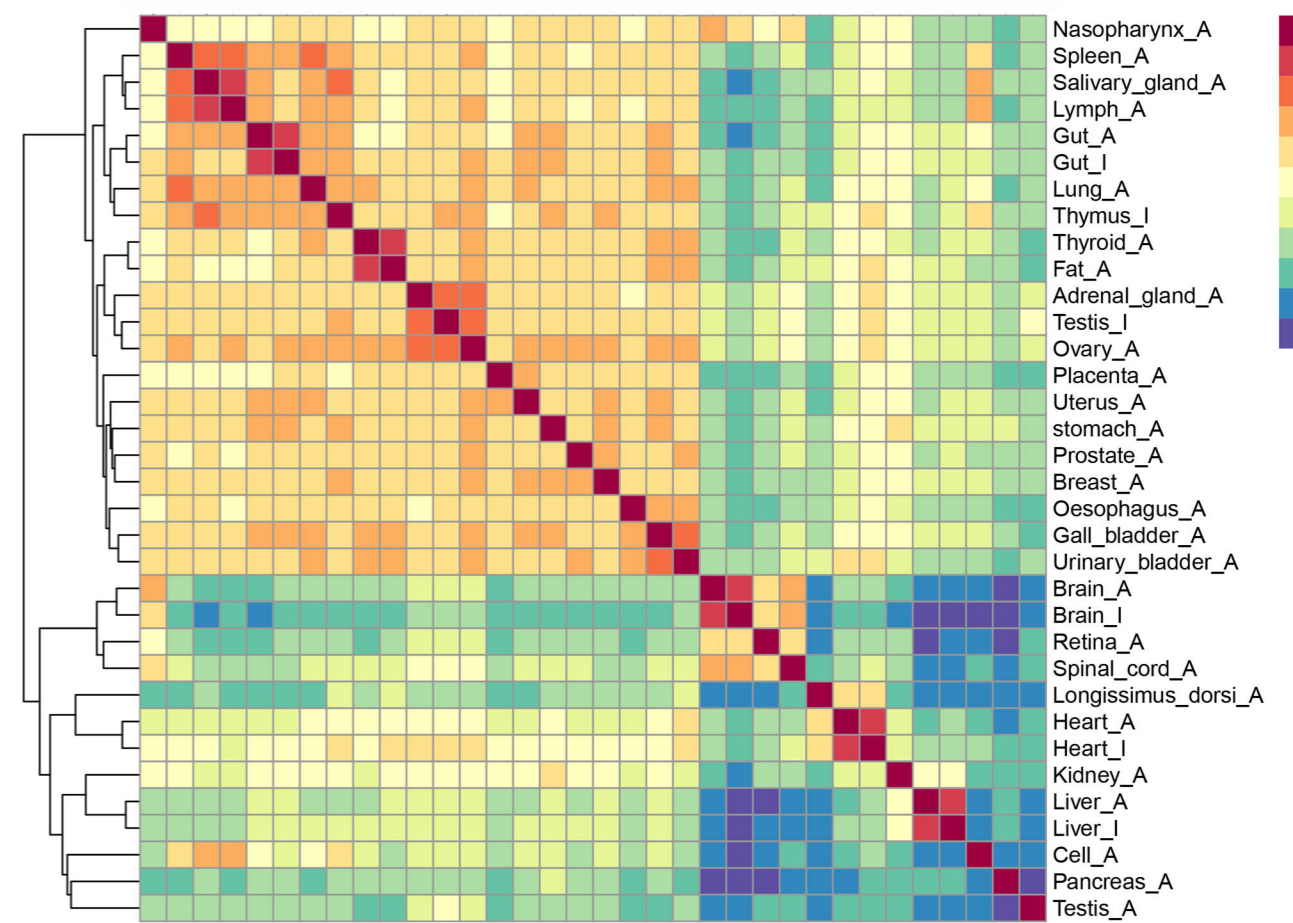**c**

Unknown Proteins Novel Proteins Unannotated Proteins LOC Proteins Well-annotated Proteins

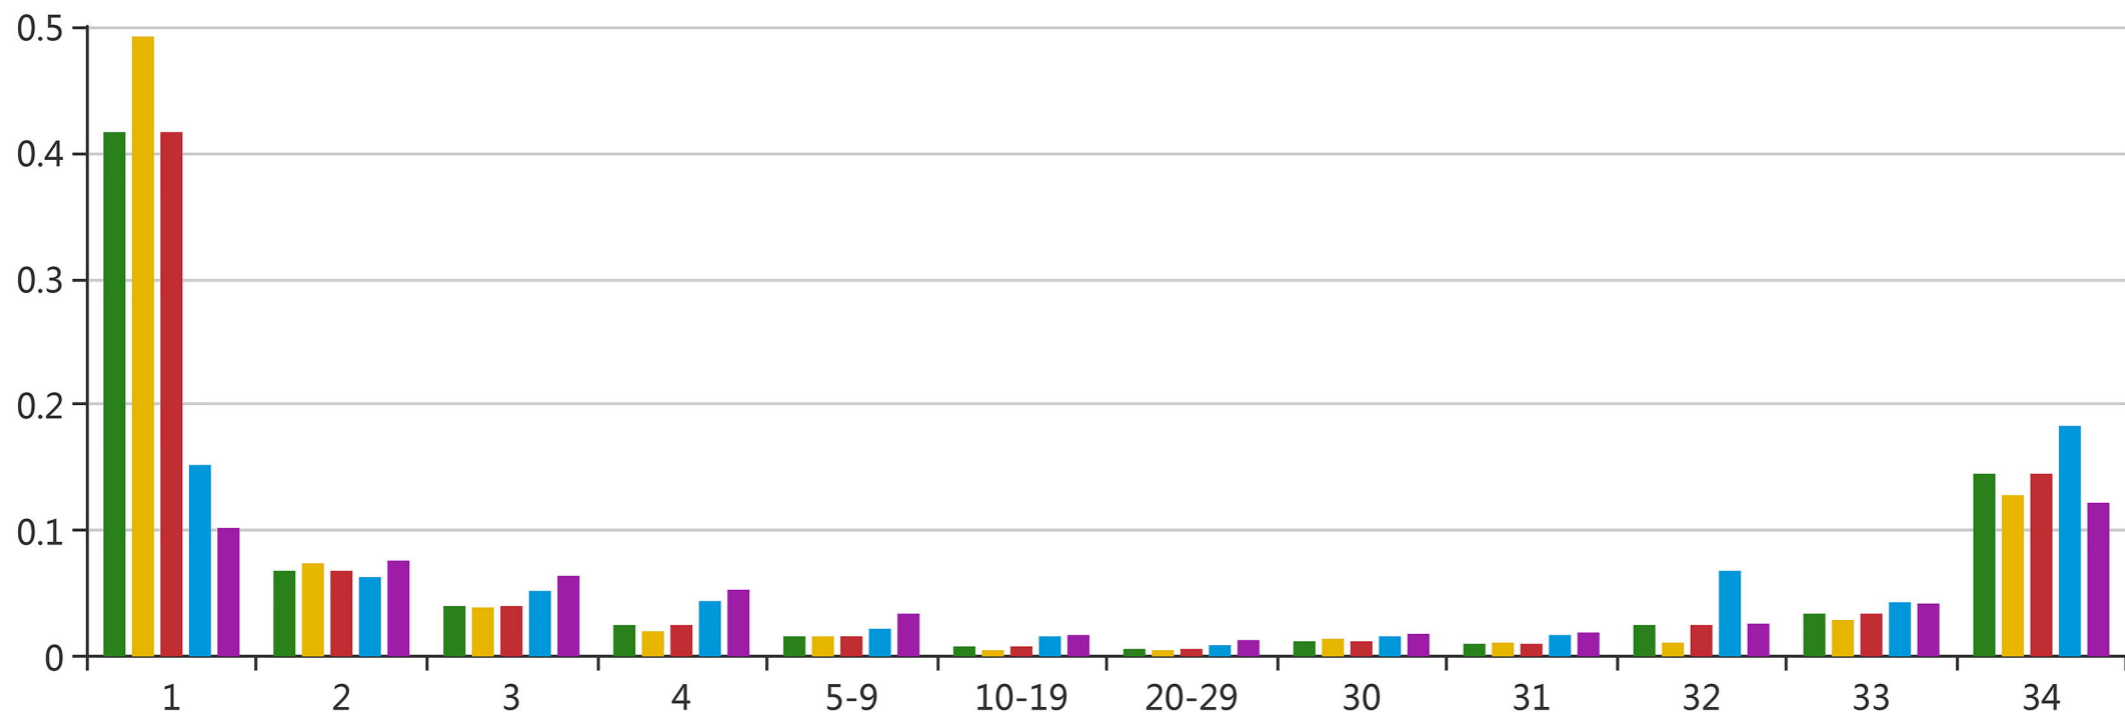

**a** Tissue types Ubiquitously-expressed genes Tissue-enriched genes Group-enriched genes

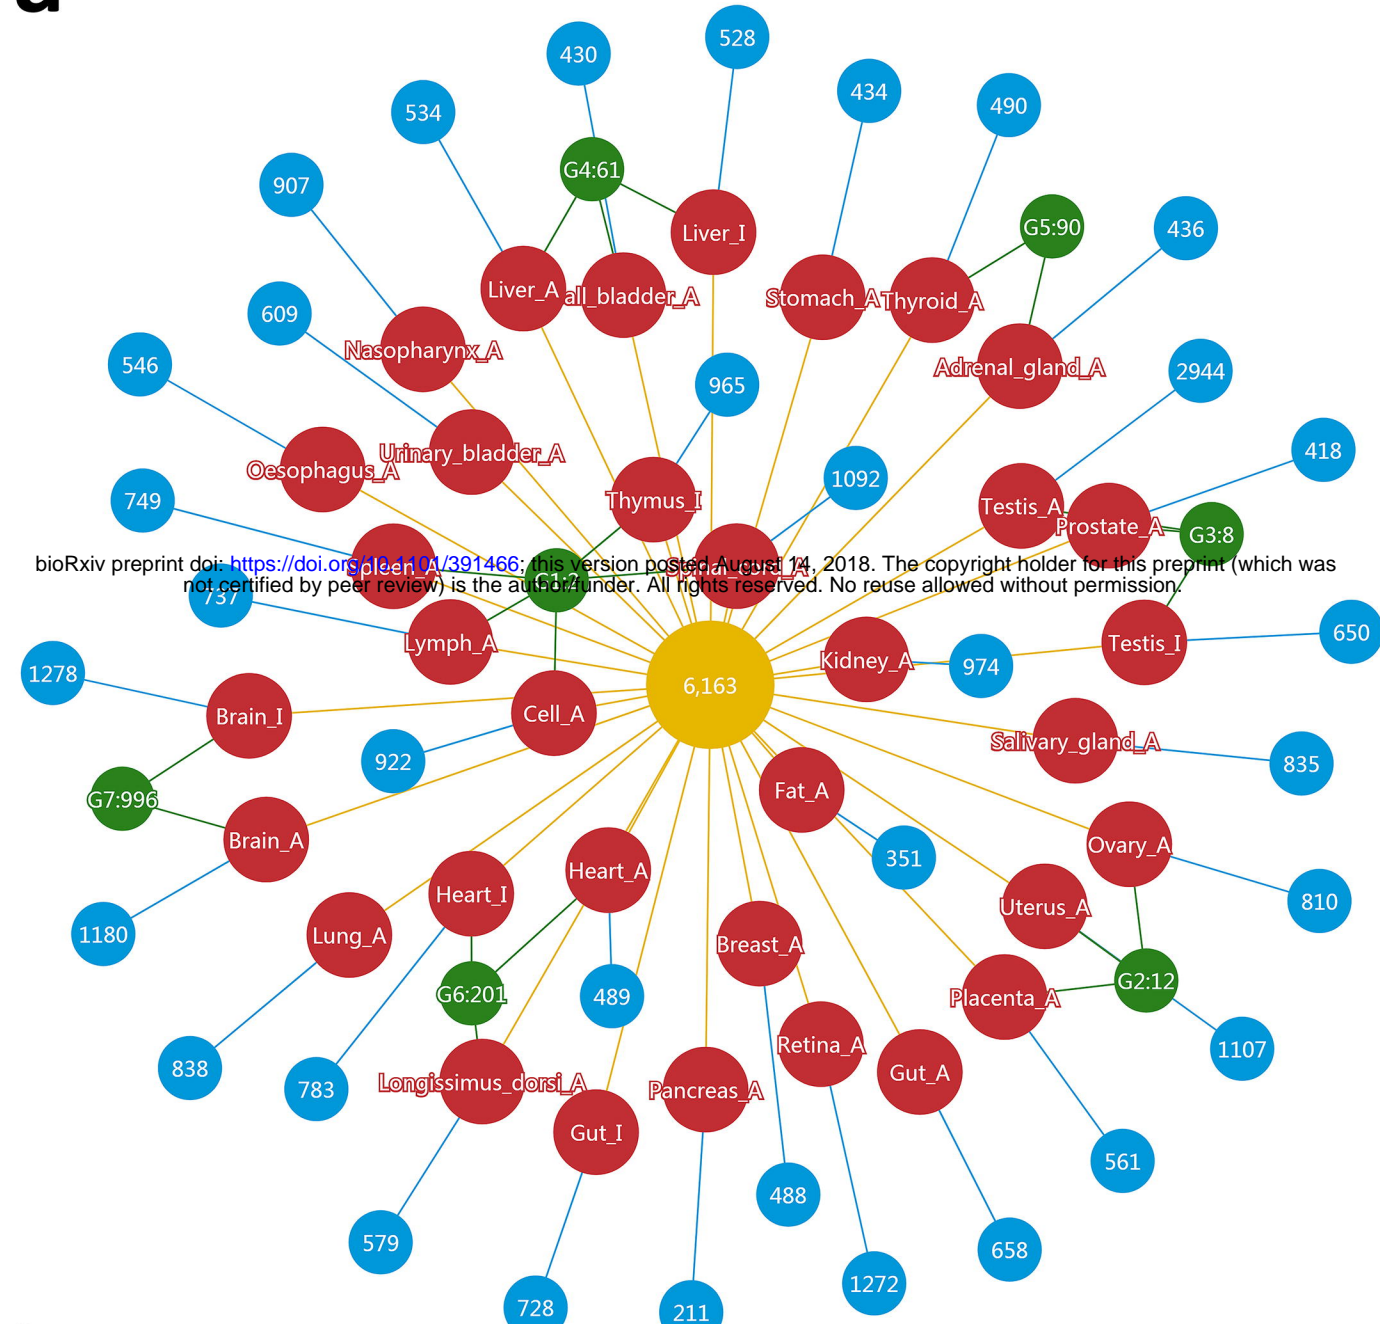

bioRxiv preprint doi: <https://doi.org/10.1101/391466>; this version posted August 14, 2018. The copyright holder for this preprint (which was not certified by peer review) is the author/funder. All rights reserved. No reuse allowed without permission.

**b** Well-annotated protein isoforms Unknown protein isoforms

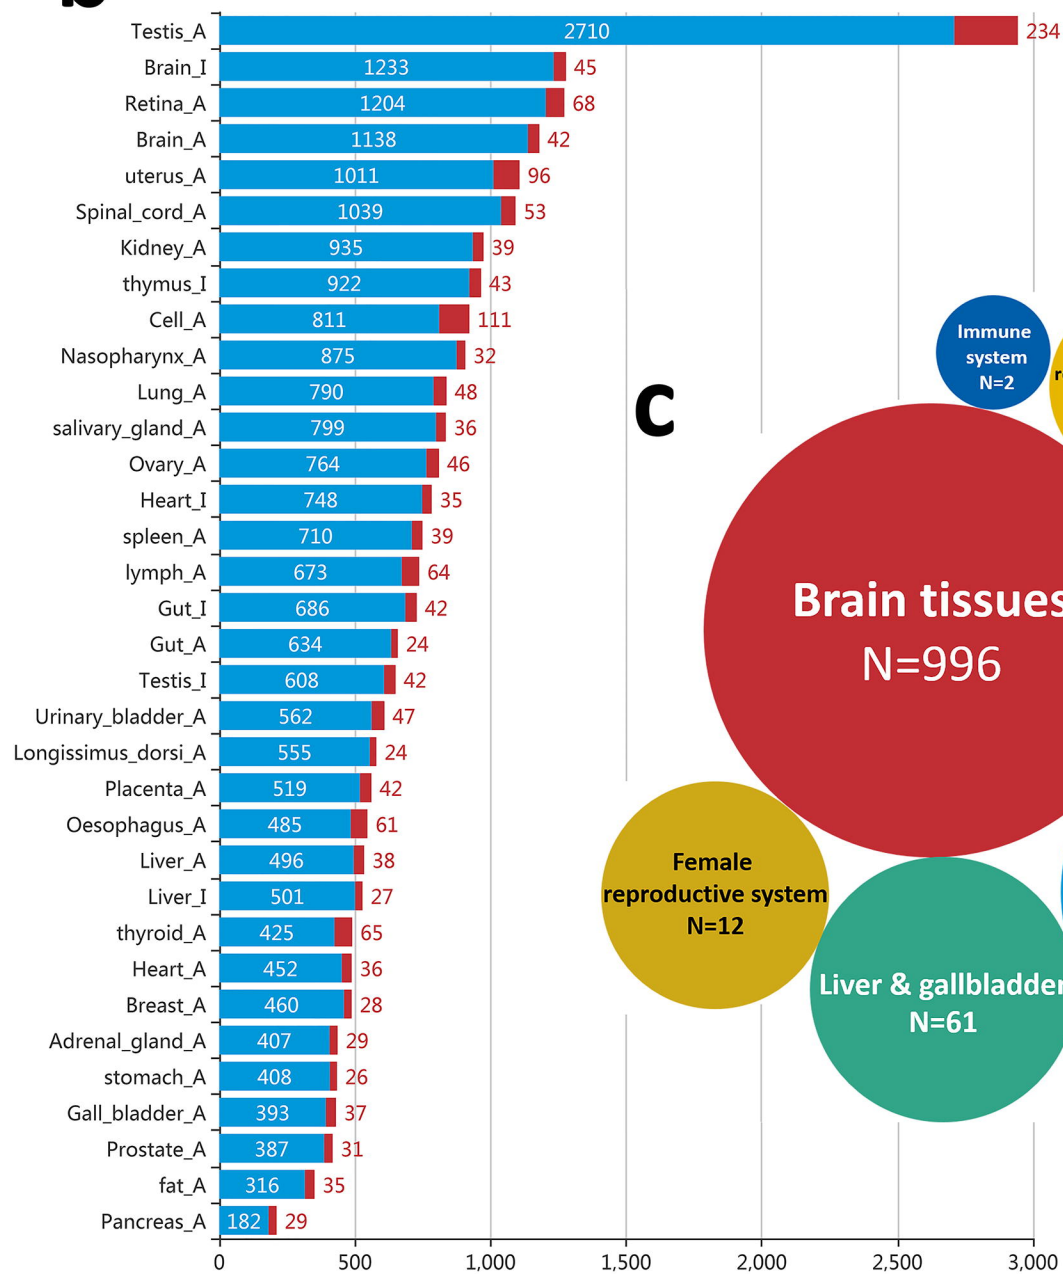

**c**

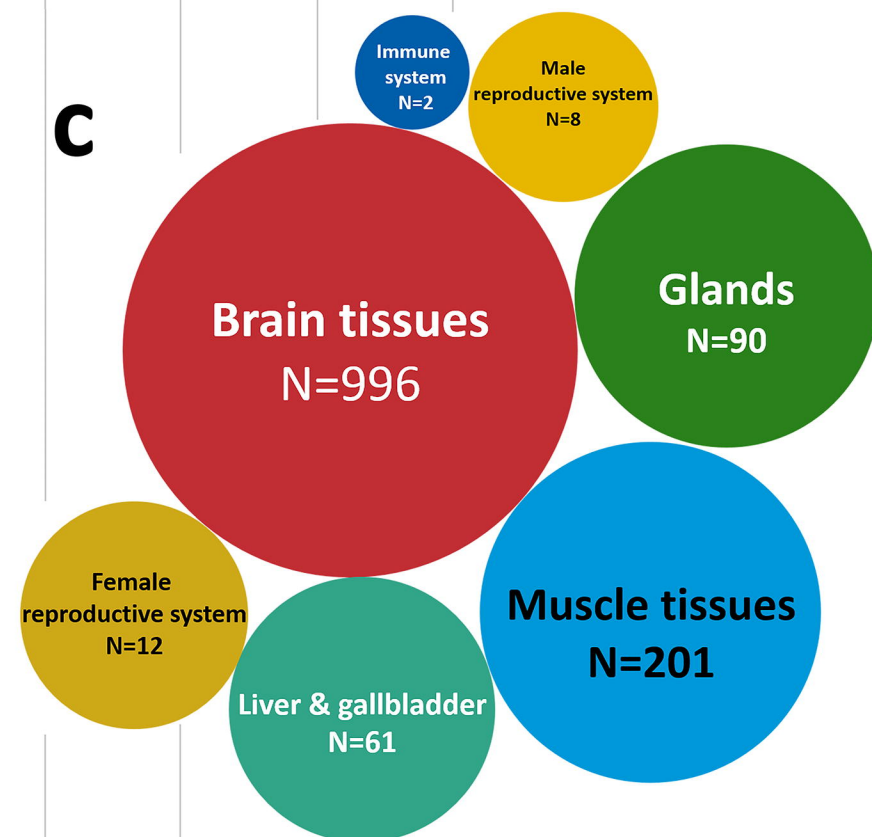

**d**

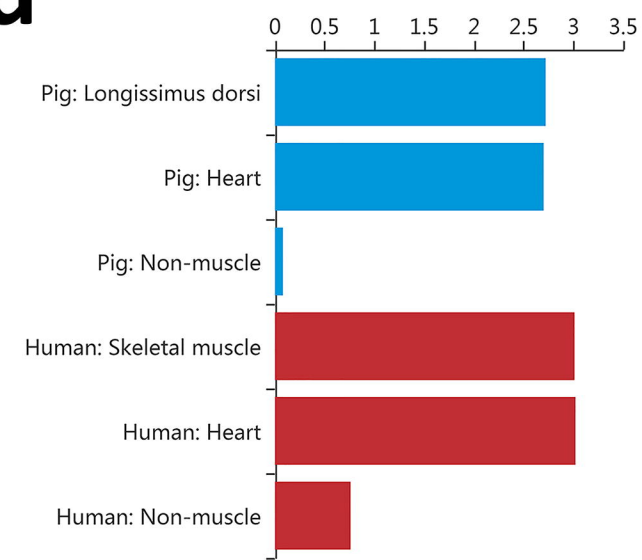

**e**

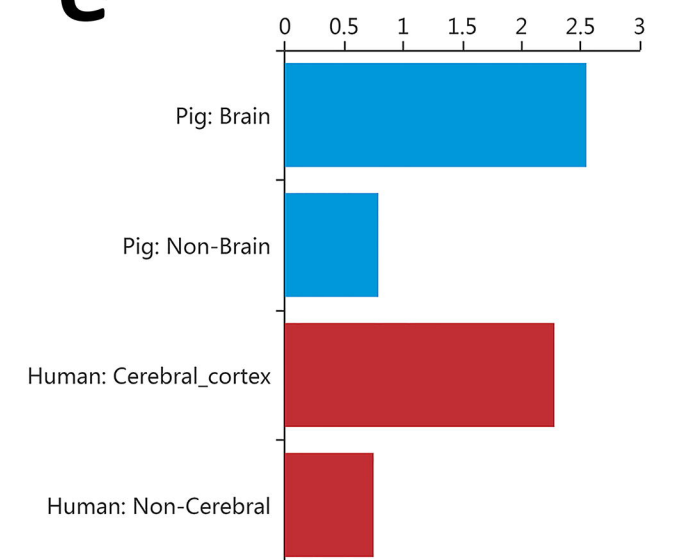

**f**

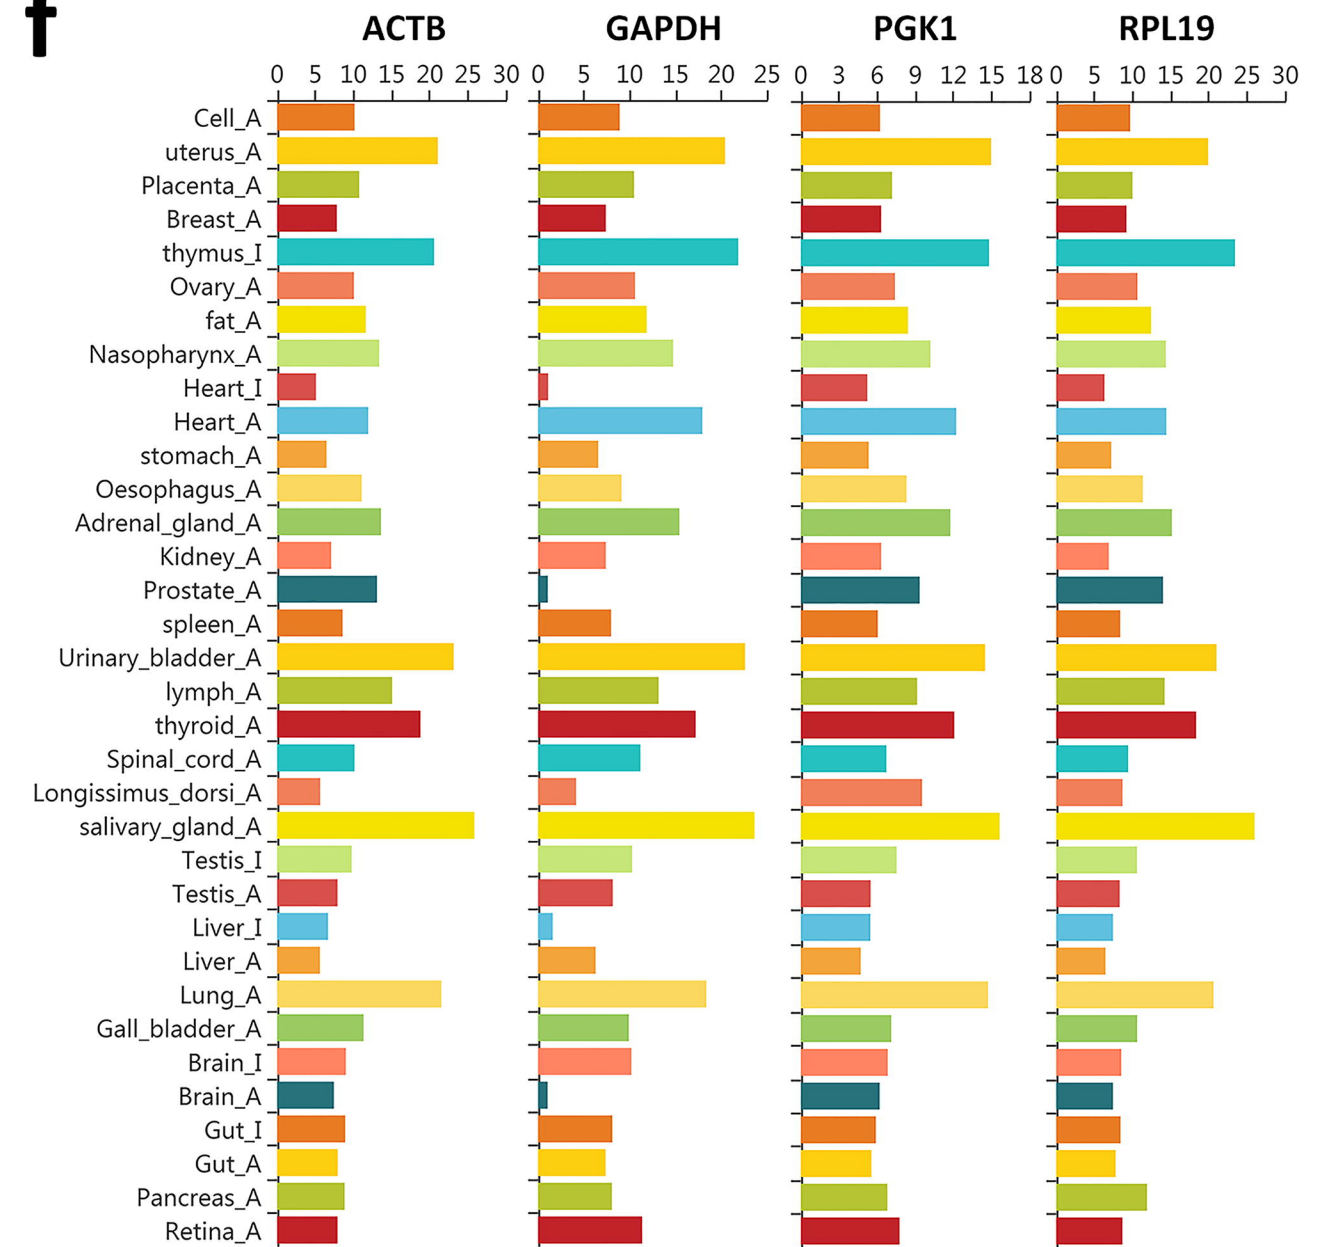

**g**

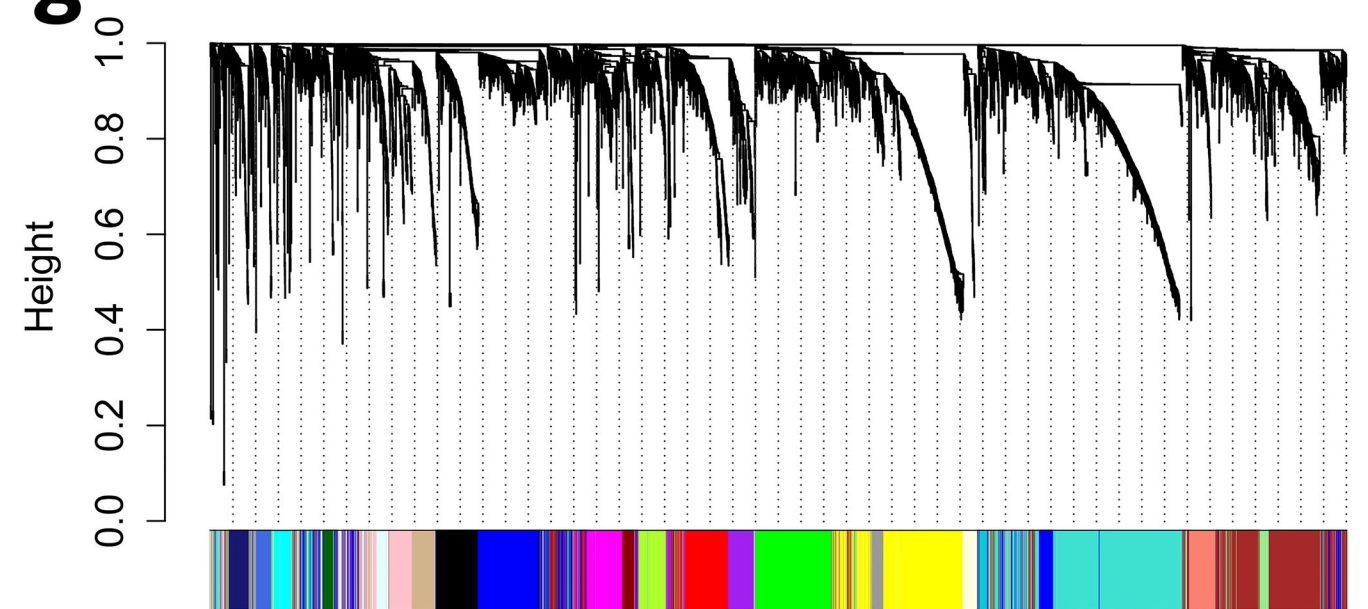

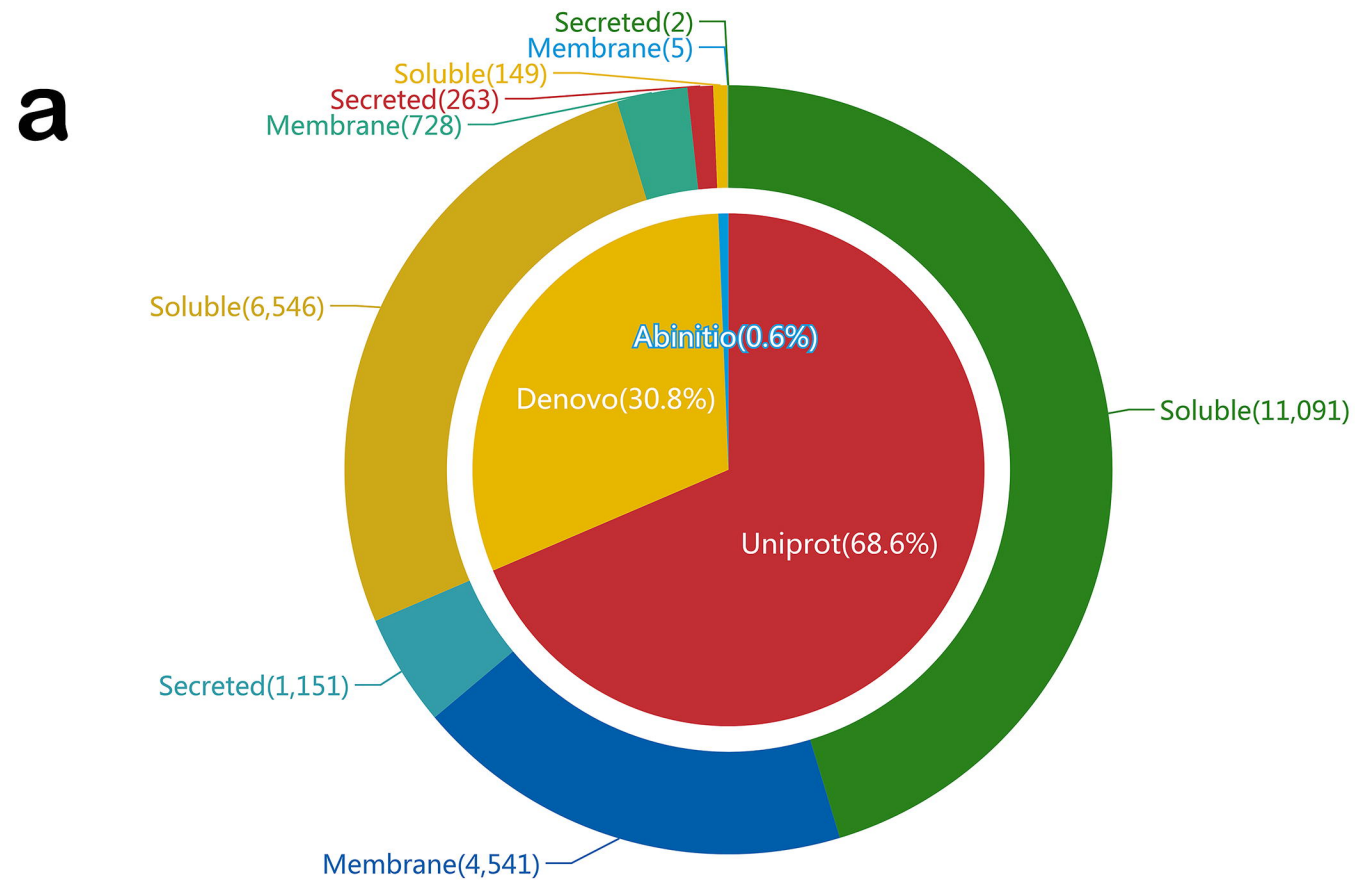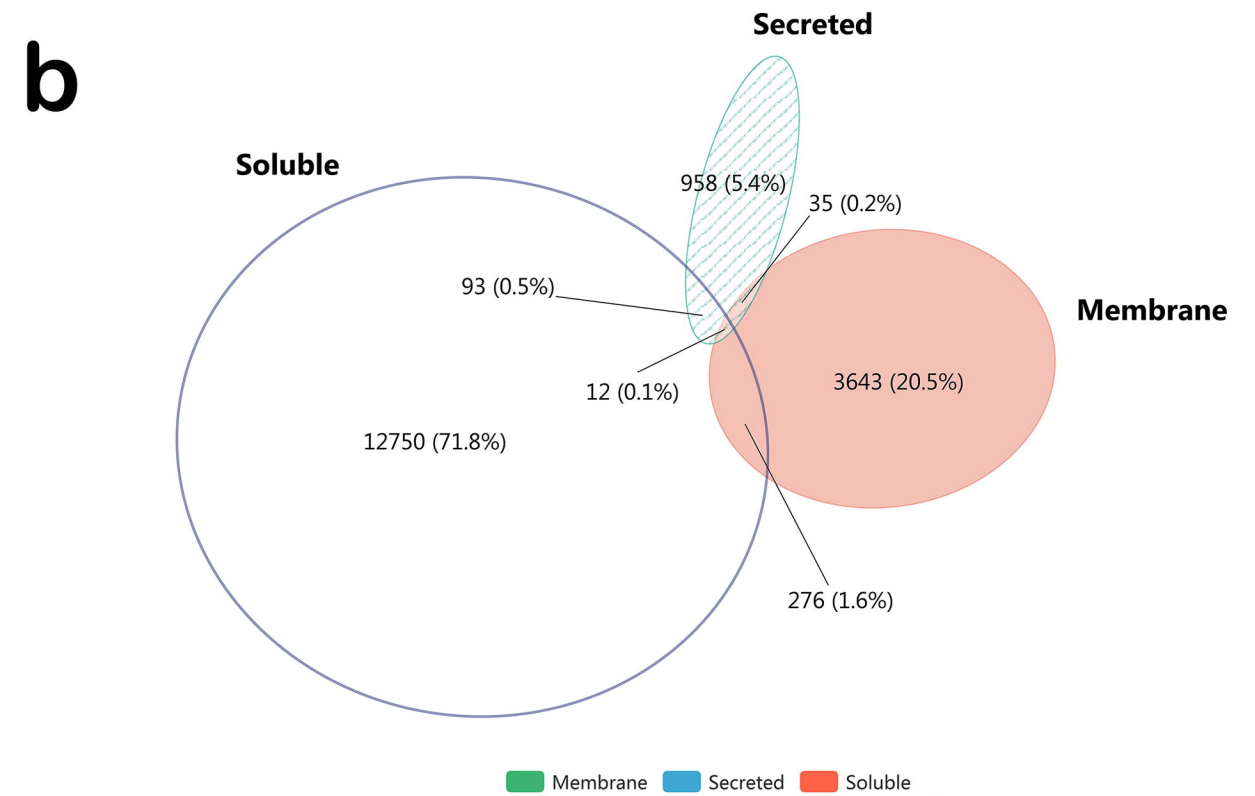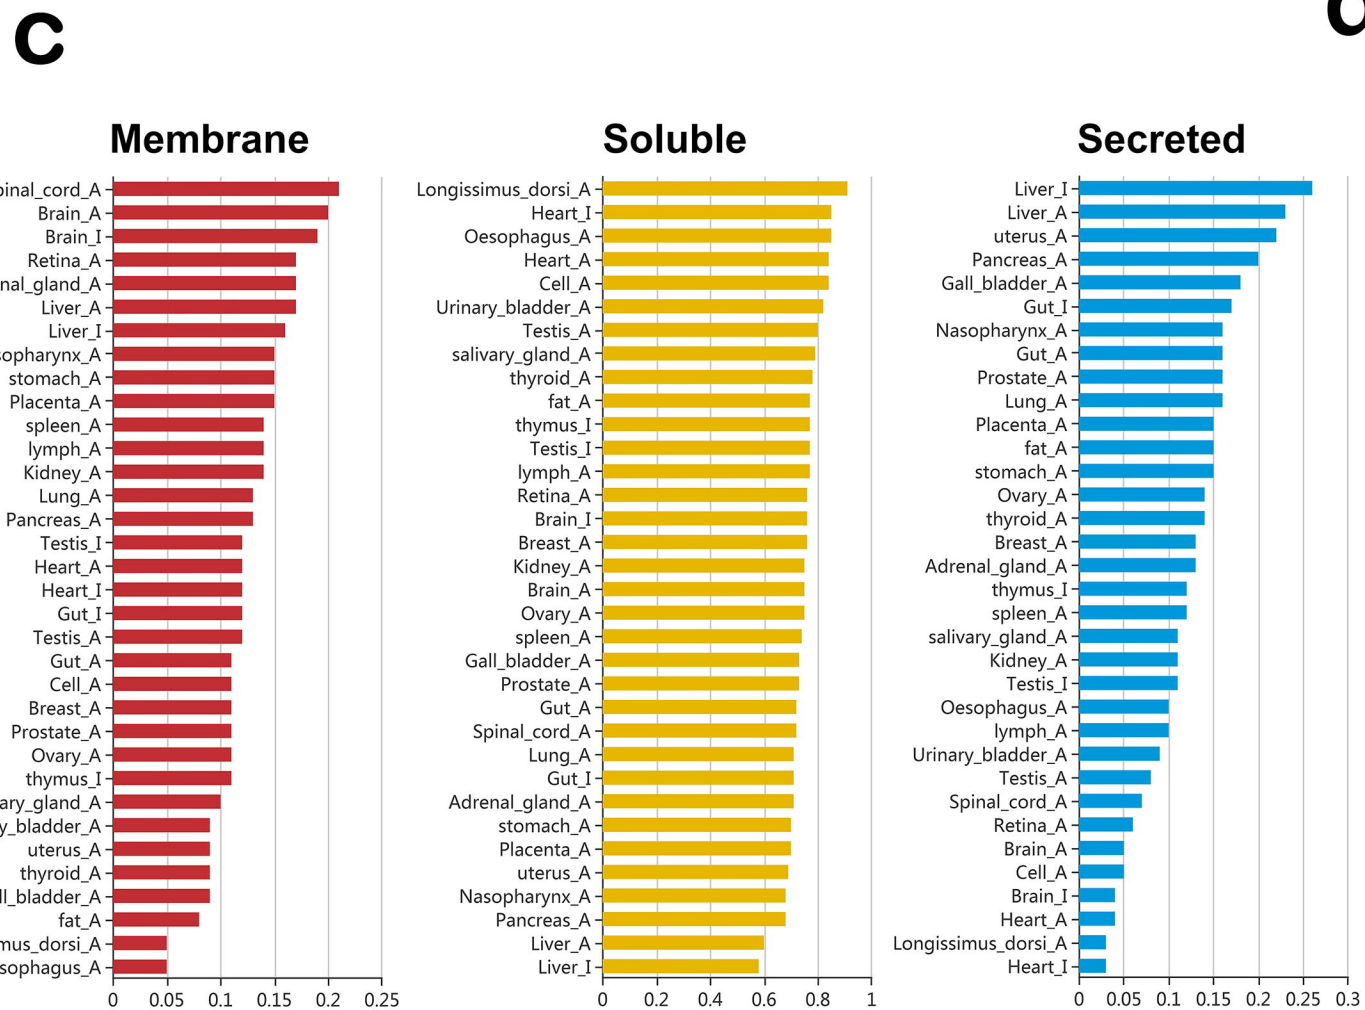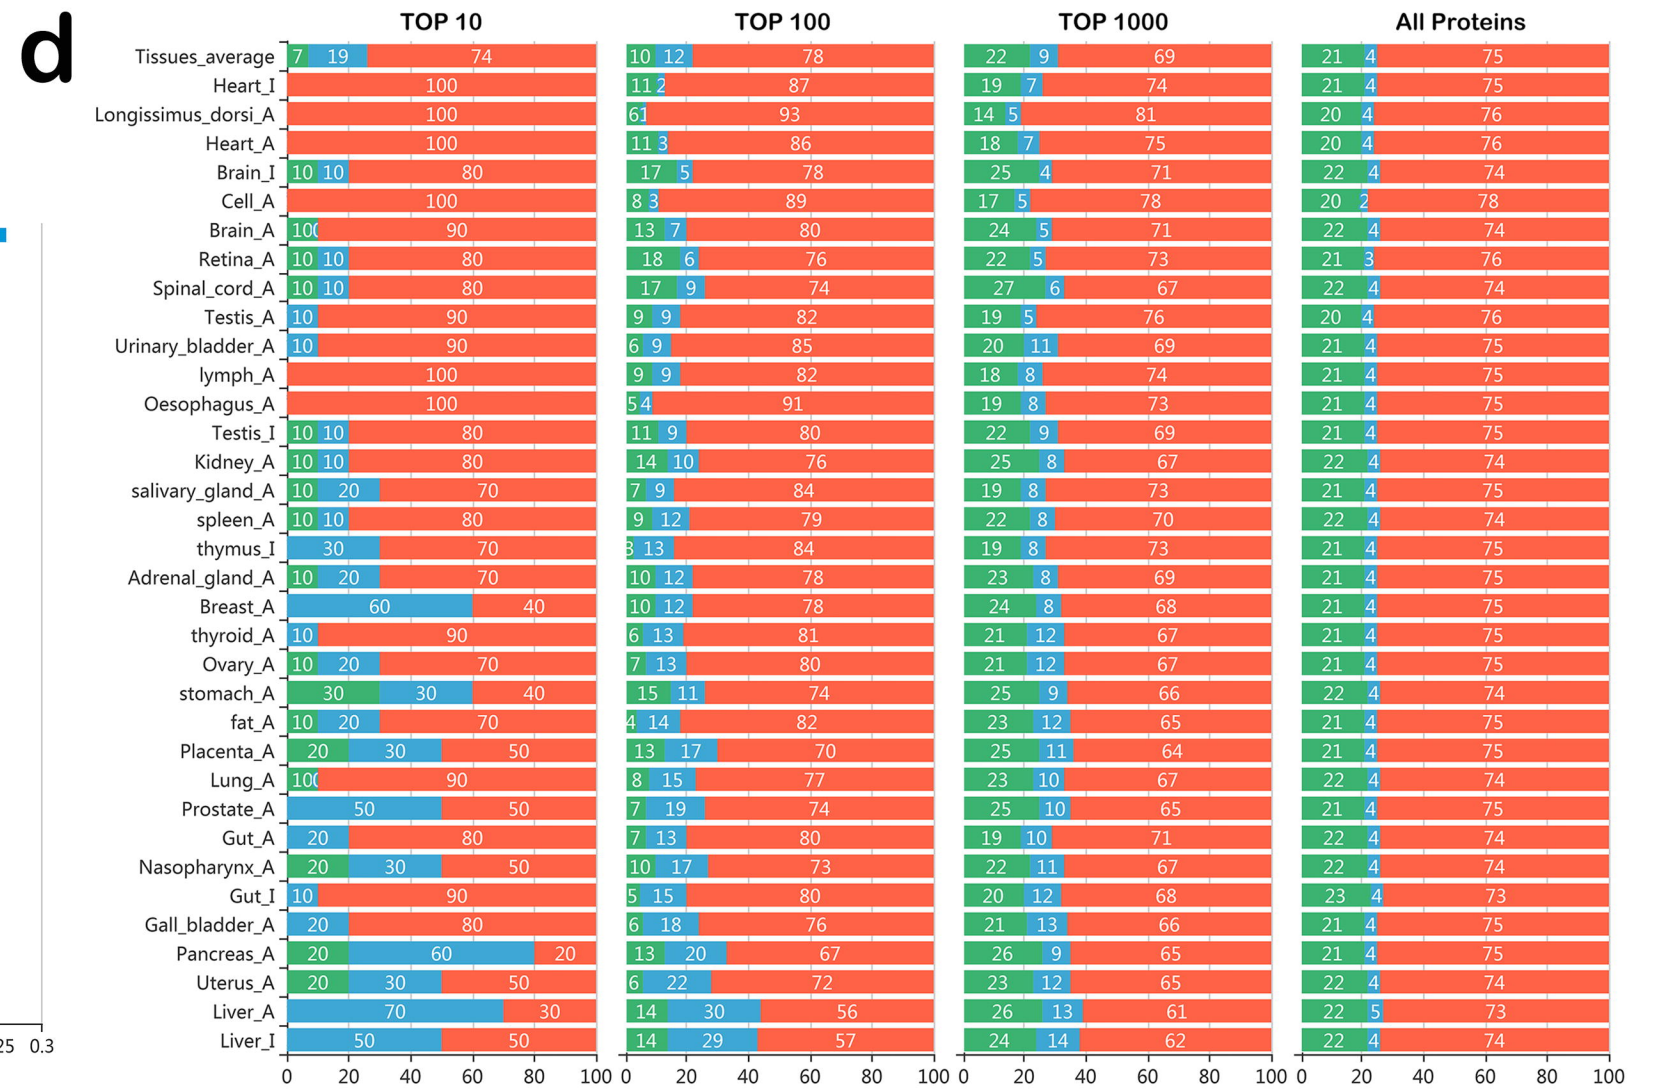

**a**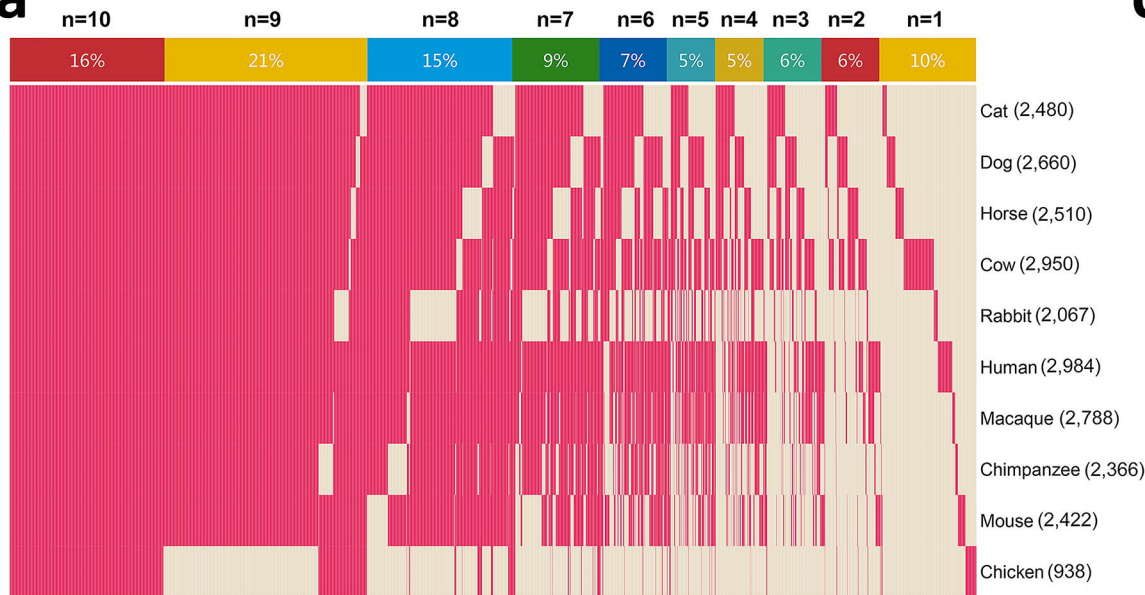**c**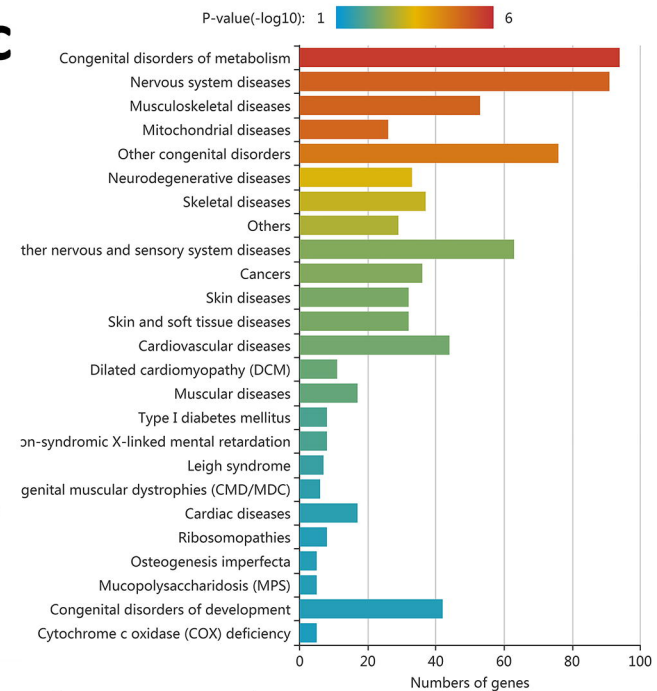**b**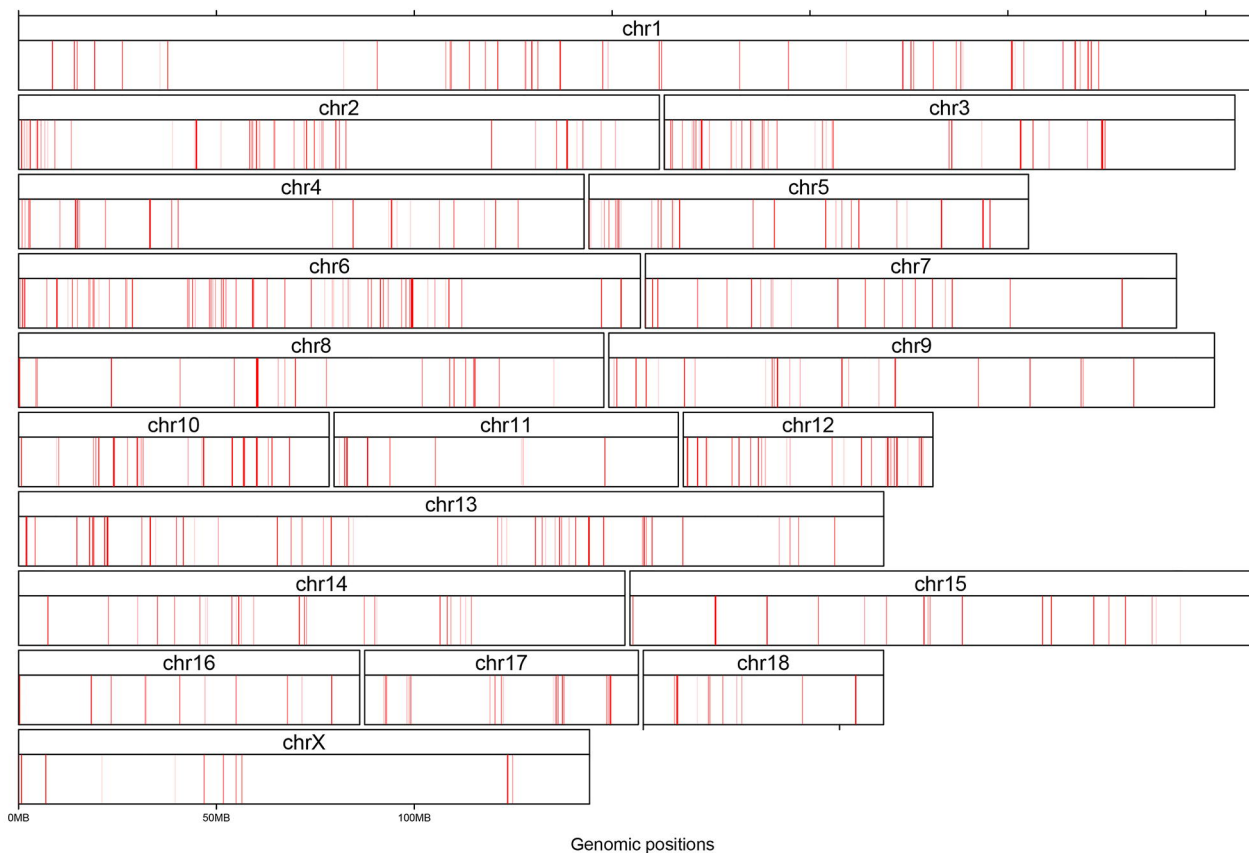

Source: https://www.biorxiv.org/content/10.1101/391466v1.full.pdf
